# Learning the rules of collective cell migration using deep attention networks

Julienne LaChance<sup>1</sup>, Kevin Suh<sup>2</sup>, Daniel J. Cohen<sup>1,2\*</sup>

<sup>1</sup>Department of Mechanical and Aerospace Engineering, Princeton University, Princeton, New Jersey, USA

<sup>2</sup>Department of Chemical and Biological Engineering, Princeton University, Princeton, New Jersey, USA

Correspondence should be sent to:

Daniel J. Cohen

[danielcohen@princeton.edu](mailto:danielcohen@princeton.edu)

109 Hoyt Laboratory

Princeton University

Princeton, NJ 08544

## Abstract

Collective, coordinated cellular motions underpin key processes in all multicellular organisms, yet it has been difficult to express the ‘rules’ behind these motions in clear, interpretable forms. Here we apply deep attention networks to analyze several canonical living tissues systems and present the underlying collective migration rules for each tissue type using only cell migration trajectory data. We use these networks to learn the behaviors of key tissue types with distinct collective behaviors—epithelial, endothelial, and metastatic breast cancer cells—and show how the results complement traditional biophysical approaches. In particular, we present attention maps indicating the relative influence of neighboring cells to the learned turning decisions of a focal cell. These attention networks reveal distinct patterns of influence and attention unique to each model tissue. Endothelial cells exhibit tightly focused attention on their immediate forward-most neighbors, while cells in more expansile epithelial tissues are more broadly influenced by neighbors in a relatively large forward sector. Attention maps of ensembles of more mesenchymal, metastatic cells reveal completely symmetric attention patterns, indicating the lack of any particular coordination or direction of interest. Moreover, we show how attention networks are capable of detecting and learning how these rules changes based on biophysical context, such as location within the tissue and cellular crowding. That these results require only cellular trajectories and no modeling assumptions highlights the potential of attention networks for providing further biological insights into complex cellular systems.

## Author Summary

Collective behaviors are crucial to the function of multicellular life, with large-scale, coordinated cell migration enabling processes spanning organ formation to coordinated skin healing. However, we lack effective tools to discover and cleanly express collective rules at the level of an individual cell. Here, we employ a carefully structured neural network to extract collective information directly from cell trajectory data. The network is trained on data from various systems, including well-studied cell types (HUVEC and MDCK cells) which display visually distinct forms of collective motion, and metastatic cancer cells (MDA-MB-231) which are highly uncoordinated. Using these trained networks, we can produce attention maps for each system,

which indicate how a cell within a tissue takes in information from its surrounding neighbors, as a function of weights assigned to those neighbors. Thus for a cell type in which cells tend to follow the path of the cell in front, the attention maps will display high weights for cells spatially forward of the focal cell. We present results in terms of additional metrics, such as accuracy plots and number of interacting cells, and encourage future development of improved metrics.

## Introduction

Coordinated, collective migration is a hallmark, and enabler, of multicellular life. Spanning local clusters of migrating cells<sup>1</sup>, large-scale supracellular migration across tissues<sup>2,3</sup>, wound healing, and even coordinated cancer invasion<sup>4,5</sup>, coordinated patterns of motion allow for complex behaviors to emerge. Understanding the collective behaviors that enable these processes can not only improve our fundamental biological knowledge, but can allow us to more effectively detect abnormalities and pathologies, and perhaps make better prognostic or diagnostic assessments<sup>6,7</sup>. To realize this potential, we need to first be able to define the underlying ‘interaction rules’ that give rise to something like humans queuing in line, jammed penguins clusters shuffling on the ice<sup>8</sup>, and metastatic cancer cells disseminating through healthy tissue<sup>7</sup>. However, detecting and classifying these behaviors is not straightforward, as different fields rely on unique tools, analyses, and lexicons. Here, we explore the utility of translating deep attention networks, previously used to reveal rules of collective motion in tens of schooling fish<sup>9</sup>, to thousands of interacting and migrating cells of disparate origins with unique patterns of motion—blood vessel endothelial cell sheets; kidney epithelial cell sheets; and large ensembles of metastatic breast cancer cells (representative motion trajectories are shown in Figs. 1A-C, with movies in S1-3 Movies, respectively). Crucially, this technique requires only cell trajectory data rather than any assumptions of underlying models or dynamics.

1  
2 As collective behaviors play out at the ensemble level, approaches from statistical mechanics  
3 are used to great effect to identify patterns in collective cell motion. For instance, early  
4 applications of measures such as velocity correlations to assess order and directionality in bird  
5 flock dynamics<sup>10,11</sup> have since been repurposed for collectively migrating cells<sup>12–16</sup>.  
6 Representative analyses are shown in Figs. 1D-E, such as ensemble speed, and mean squared  
7 displacement (MSD). Approaches like MSD analysis can allow biophysical classification of  
8 collective migration strategies. For instance: HUVECs exhibit highly directed, super-diffusive  
9 migration (Fig. 1E, green; S1 Movie); the MDCK epithelium exhibits short term directionality and  
10 long term, sub-diffusive caging (Fig. 1E, blue; S2 Movie); while metastatic MDA-MB-231  
11 ensembles are very much diffusive (Fig. 1E, red and linear; S3 Movie). Likewise, others have  
12 used measures of self-diffusivity and internal deformations to describe the glass-like dynamics  
13 of such systems, quantifying the similarities between fluid-like behavior of cell sheets over long  
14 time scales and solid-like behavior at short time scales with supercooled fluids approaching a  
15 glass transition<sup>17</sup>.

16  
17 Further, numerous classical physical models have been developed in an attempt to describe  
18 collective cell migration, including lattice, phase-field, active network, particle, and continuum  
19 models<sup>18</sup>, with some scholars moving towards the utilization of reinforcement learning to  
20 construct agent-based models in recent years<sup>19–21</sup>. A hallmark of all of these approaches is that  
21 they are rooted in physical assumptions and first principles. While these classical approaches  
22 are constrained by parameter complexity, enabling scientists to write mathematical descriptions  
23 of the system and obtain an intuitive grasp of the model components, they are often unable to  
24 effectively or efficiently capture high-dimensional interaction relationships.  
25

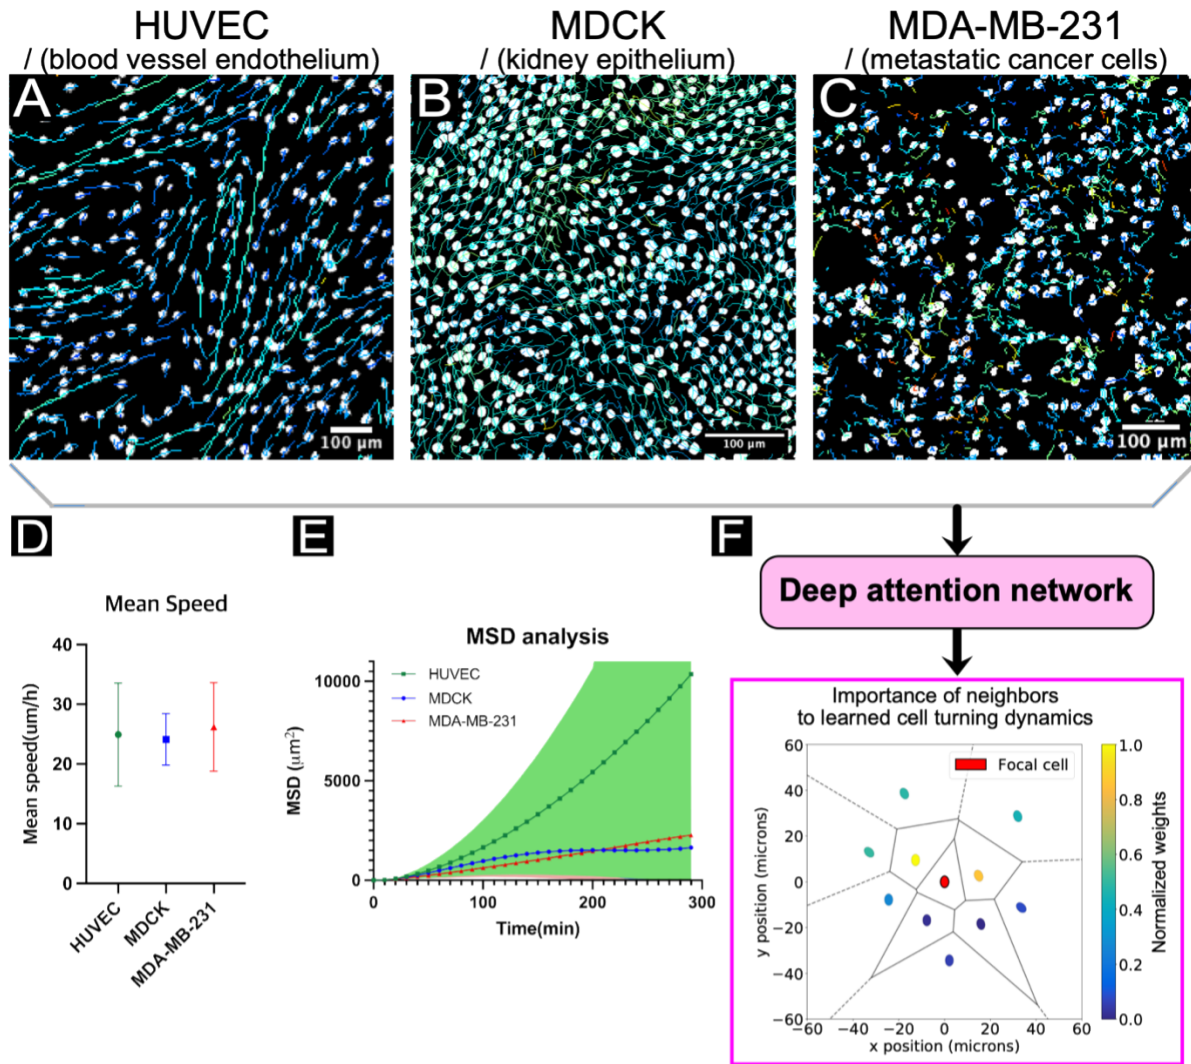

26  
27

**Fig 1 Cell trajectory data reveals collective rules.**

(A, B, C) Representative cell trajectories within living tissues, from human umbilical vein endothelial cells (HUVEC), Madin-Darby Canine Kidney cells (MDCK), and epithelial, metastatic human breast cancer cells (MDA-MB-231), respectively. All three cell lines exhibit visually distinct dynamics: the HUVECs tend to have strongly correlated and directed leader/follower behavior; while MDCKs exhibit more complex coordination patterns and lack the directedness of HUVECs (e.g. see <sup>32</sup>); and the MDA-MB-231's lack coordination with neighbors. Scale bars are 100  $\mu\text{m}$ . **See S1-3 Movies.** (D) Classical collective analysis techniques reveal some group characteristics, such as mean speed or (E) mean squared displacement (MSD) over time. MSD analysis shows highly uncoordinated motion of the MDA-MB-231 cell line. HUVEC exhibited super-diffusive motion, and MDCK migrated in sub-diffusive mode corresponding to a caging effect of neighboring cells.<sup>33</sup> However, MDA-MB-231 showed diffusive, Brownian like motion. (F) Deep attention networks trained on cell trajectory data can directly reveal new types of collective information, such as the "importance" of neighboring cells to forward motion of a focal cell. Here, the agents in front of the focal cell have higher weights,  $W$  (see Equation 1), with relative directions determined by agent trajectories. Cell position is representing using nuclei centroids and black lines indicate Voronoi cells (see *Methods*).

28

29

30

31

32

33

34

35

36

37

38

Deep learning, in contrast to physics-based approaches, offers intriguing potential for the automated discovery of collective behaviors based solely on relatively simple biological input data, such as cell migration trajectories. This approach can reduce researcher bias and the need for formalized models and, when paired with interpretable data output and visualizations,

39

40

41

42

43

44

45

46

47 can express clear patterns of behavior in complex systems. Thanks to recent advances in high-  
48 throughput, high-content microscopy<sup>22,23</sup> and image processing<sup>24–28</sup>, rich visual features can be  
49 extracted from massive, dynamic populations of cells, providing a wealth of the kind of raw data  
50 through which deep learning approaches excel at sifting. Unfortunately, while deep learning  
51 methods can be structured to capture high-dimensional functions, they are often difficult to  
52 interpret. To address this, recent efforts have employed a newer approach—deep attention  
53 networks<sup>29–31</sup>—to reveal collective rules in schools of zebrafish (*Danio rerio*). Critically, such  
54 attention networks can be structured such that system dynamics can be learned using a  
55 function which is parameter-rich while still requiring only a small number of inputs and outputs<sup>9</sup>.  
56 In this study, we apply deep attention networks to large cellular ensembles in an attempt to  
57 identify patterns of cellular attention and underlying collective rules. Specifically we ask the  
58 following question of the deep attention network: given a ‘focal’ cell in a group of cells of a given  
59 type, to which other cells does the focal cell pay the most attention when deciding how to turn—  
60 who influences it the most (Fig. 1F)?

61  
62 It is this *interpretability* of deep attention networks which is so crucial to the identification and  
63 classification of collective rules. For any given focal cell, asocial data ( $\alpha$ , trajectory data from the  
64 focal agent) and social data from  $n$  nearest neighbors in the collective ( $\sigma_i$ , relative positions,  
65 velocities, accelerations of neighbors) are integrated by the deep attention network to predict  
66 the future motion of the focal cell—whether it will turn left/right, for example. Here,  
67 interpretability is gained because the network is structured in the form of an equation which  
68 combines a pairwise interaction function,  $\Pi$ , with a standard weighting function,  $W$ , as follows:

$$69 \quad z = \sum_{i=1}^n \Pi(\alpha, \sigma_i) \frac{W(\alpha, \sigma_i)}{\sum_j W(\alpha, \sigma_j)}, \quad (1)$$

70  
71 where  $z$  is a *logit*, a single value indicating a left or right turn of the focal agent after a fixed  
72 prediction timestep, and  $n$  is the total number of nearest neighbors<sup>9</sup>. Since the pairwise  
73 interaction,  $\Pi$ , and weight function,  $W$ , may vary according to the social and asocial variable  
74 inputs, various collective interaction rules may be recovered by observing how these functions  
75 and the output logit  $z$  change as the inputs vary: see analyses of simulated and experimental  
76 swarm systems in<sup>9</sup>. These analyses may be further supplemented or validated using classical  
77 techniques, such as assessment of mean speeds and MSD within a migrating collective (Fig  
78 1D-E). For cellular systems, we focused on *attention maps*, which represent the output of the  
79 weight function,  $W$ , for many nearest neighbors, thereby allowing us to actually determine for  
80 any given cell which neighbors are the most important (Fig 1F, S1). Combining these maps over  
81 many focal cells provides a sense of the ensemble migration rules.

82  
83

#### 84 **Defining and constraining the problem: cellular model systems selection**

85 To determine if deep attention networks reveal useful information from cellular systems, we  
86 selected three standard tissue models commonly used as gold standards in collective cell  
87 behavior studies. First, we considered sheets of cultured Human Umbilical Vein Endothelial  
88 Cells (HUVECs) whose hallmark is the development of strongly aligned ‘trains’ of cells migrating  
89 in a leader-follower fashion with weak lateral interactions. Next, we compare these to kidney  
90 epithelial sheets (MDCK cells)—one of the most well-studied living collective systems whose  
91 cells classically produce coordinated, swirling domains. Finally, as a negative control we attempt  
92 to extract the rules for metastatic breast cancer cells (MDA-MB-231) as metastatic cells behave  
93 more mesenchymally, or individualistically, and are known to lack key cell-cell interaction  
94 proteins<sup>34–36</sup>. Representative collective motion trajectories of these three cell types are shown in  
95 Figs. 1A-C, respectively.



96  
97 To a human observer, these tracks are visually distinct, but relating the ensemble visual  
98 patterns to which neighbors are most important to a given focal cell is not simple. Classical  
99 group-level analyses can be used to quantify and understand some of these patterns,  
100 exemplified in Figs. 1D-E. For instance, while all cell types exhibit similar mean speeds (Fig.  
101 1D), they have markedly different migratory dynamics, as seen in the raw trajectories and MSD  
102 (Fig. 1). Ensemble analyses are powerful and can, and should, be used to learn more about  
103 these systems, but ultimately they cannot directly answer the question we posed above about  
104 how a given focal cell allocates attention and which neighbors are most critical. To address this,  
105 we trained a deep attention network using cell trajectory data from long, time-lapse recordings.  
106 The trained network can then directly determine the number, location, and characteristics of the  
107 most important neighbors for a focal cell, as shown in Fig. 1F where a focal agent is shown with  
108 its 10 nearest neighbors. Here, the neighbors are colored according to the (normalized)  
109 aggregation weights ( $W$ ) from a model trained on tissues of the same type (MDCK). Due to the  
110 structure of the network, the colors indicate the relatively higher influence of neighboring cells  
111 forward and to the sides of the focal cell for influencing migration behaviors (representative  
112 snapshots from our other model systems are shown in S1 Fig.). In this study, we focused on  
113 aggregating these snapshots across many focal agents- and their respective neighbors- to  
114 produce even more informative attention maps.  
115

116 Our approach here was to examine and compare attention maps for different cell types and  
117 analysis conditions in order to determine the feasibility of using deep attention networks for  
118 collective cell behavior insights, and to provide design guidelines for optimal parameters for this  
119 application. From the network perspective, we investigated prediction time intervals, image  
120 sampling frame rates, number of neighbors accounted for by the network structure, and blinding  
121 to certain input parameters; in each case using archetypal cell types for validation. Having  
122 validated the network, we then explored within a single model system how tissue age and where  
123 a cell is located within a tissue of a given shape affected neighbor interactions rules. When  
124 possible, we compare our findings from the network-produced attention regimes to results from  
125 classical analytical methods. Overall, our results demonstrate that deep attention networks offer  
126 a powerful, complementary approach to classical methods for analyzing cellular group dynamics  
127 that can reveal unique aspects of how specific cell types interact at the tissue level.  
128

## 129 **Results.**

### 130 ***Demonstration of attention maps for canonical cell types.***

131  
132 To validate the deep attention networks on canonical models, we first compared network  
133 performance on HUVEC endothelial sheets and MDCK epithelial sheets. Representative  
134 fluorescence images of each cell type are shown in Fig. 2A highlighting VE- or E-cadherin at  
135 cell-cell junctions. This context is important to understand that highly collective cells tend to be  
136 physically coupled to each other through mechano-sensitive junctional proteins<sup>37</sup>. To  
137 standardize all model systems and analyses and provide sufficient replicates, we grew tissues  
138 in microfabricated circular stencil arrays and seeded a sufficient number of cells to reach  
139 confluence before analysis. Specifically, we incubated cells within these stencils for ~16 hrs to  
140 ensure formation of confluent tissues with no gaps (all cells should have contiguous neighbors),  
141 and then removed the stencils to allow the tissues to grow out. This approach is well  
142 characterized for these cell types and collective cell behavior studies<sup>14,38</sup> and generates tissues  
143 with distinct boundary and bulk regions. We then performed automated, phase-contrast time-  
144 lapse imaging over 12-24 hrs. Nuclei were segmented using a convolutional neural network<sup>39</sup>  
145 (MDCK), or live nuclear imaging (HUVEC, MDA-MB-231), and then tracked to generate

146 trajectories for every cell over the course of the experiment, after which the data were ready for  
 147 attention analysis.

148  
 149 Raw trajectory data were processed to determine the social and asocial variables as input to the  
 150 attention network, as well as output turning logits. Data were split into training, validation, and  
 151 test sets, and all results provided are reflective of the test set (with the exception of training loss  
 152 and accuracy plots in S2 Fig). Raw data, code, and documentation are provided at GitHub and  
 153 Zenodo (see *Methods*). To best visually capture an attention map for a given tissue type, we  
 154 integrated the individual attention snapshots (e.g. Fig. 1F) over 10,000 individual cells from  
 155 across the different replicates and interpolated the attention weights in space (x,y position of  
 156 neighboring cells of the focal cell) as a contour plot as shown in Figs. 2C-C'. For our initial  
 157 analyses, the attention networks were structured to analyze only the 10 nearest neighbors of a  
 158 given focal cell, trajectories were sampled every ten minutes, and the prediction interval was 20  
 159 minutes. The importance of these parameters and related design considerations will be  
 160 discussed in the following sections.

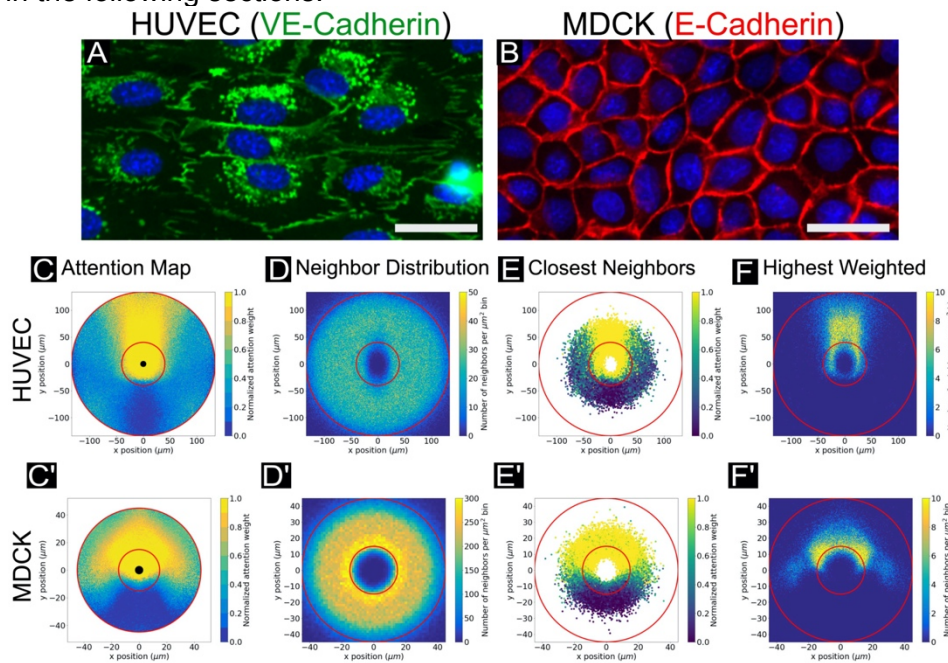

161  
 162 **Fig 2 Network attention across canonical cell types.**  
 163 (A) VE-cadherin cell-cell junctions are indicated in red, with cell nuclei indicated in blue. VE-cadherin fingers in HUVEC cells indicate the direction of  
 164 coupling between leader and follower cells. Scale bar is 30  $\mu\text{m}$ .  
 165 (B) E-cadherin cell-cell junctions are indicated in red, with cell nuclei indicated in blue. E-cadherin walls do not visibly indicate coordination as VE-  
 166 cadherin in HUVECs. Scale bar is 30  $\mu\text{m}$ .  
 167 (C, C') Representative attention weight contour plots are shown for HUVEC (*top*) and MDCK cells (*bottom*). For all conditions, normalized weight maps  
 168 are shown. The HUVEC attention map highlights the tendency of HUVECs to “follow the leader”, with high attention weight values assigned to cells  
 169 directly in front of the focal cell, spatially. By contrast, the MDCK map displays higher attention weights forward and to the sides. Central black circles  
 170 indicate the radius of the closest neighbor location in the dataset. For all plots shown, networks were structured to encompass 10 neighbors, with  
 171 trajectory timesteps of 10 minutes and forward prediction times of 20 minutes.  
 172 (D, D') Histograms showing the distribution of data points (neighbor cell locations) from which the attention maps in (C, C') were generated. In (C, C')  
 173 and D, D'), thin red circular lines indicate the annulus in which the bulk of the data (5%-95%) lies by radius (see *Methods*). Network results are  
 174 expected to be more reliable within this region. Histogram bins span 1  $\mu\text{m}^2$ .  
 175 (E, E') Scatter plots showing locations of the closest neighbor to a focal agent across all focal cells, colored by normalized attention weight.  
 176 (F, F') Histograms showing the locations of only the neighbor with highest weight value for each individual focal cell. Histogram bins span 1  $\mu\text{m}^2$ .

177  
 178 Looking first at the attention maps for HUVECs and MDCKs immediately revealed clear  
 179 differences in collective attention between the two cells. Starting with HUVECs, the network  
 180 determined the most influential neighbors to be overwhelmingly directly ahead of a given focal

181 cell (Fig. 2C) with very little influence from either side or the rearward neighbors. An advantage  
182 to working with HUVECS is that there is a clear biological basis for such behavior—polarized  
183 fingers of VE-cadherin (visible in Fig. 2A) protrude from the leading edge and into the trailing  
184 edge of any given cell in a train. . Such fingers are not observed at lateral edges, resulting in the  
185 highly directed ‘trains’ of cell migration so characteristic of HUVECs<sup>40</sup>. Intriguingly, the lack of  
186 rearward attention captured in the map reveals information not immediately recoverable by  
187 classical methods, which have previously indicated only that velocity correlations exist between  
188 a focal agent and both its forward and rearward nearest neighbors, respectively<sup>40</sup>. Similarly,  
189 fluorescence imaging data alone was unable to reveal the relative influence of front versus rear  
190 fingers. By contrast, the network can decouple simple directionality correlations (e.g. cells are  
191 moving the same direction) from attention, revealing that the immediately forward cells  
192 *specifically* have far more influence on endothelial cells than lateral or rear cellular neighbors.  
193 By contrast, MDCK cells exhibited a far broader angle of influence (Fig. 2C’), with the most  
194 influential neighbors apparently lying within a ~160° sector around a given focal cell. This again  
195 agrees with biological context, given that epithelial cells tend to adhere strongly to neighbors on  
196 all sides (Fig. 2B) and move through arcing turns as large, correlated domains<sup>14,15,38</sup>

197  
198 Attention maps are interpolated over the population and could potentially be biased if cells were  
199 irregularly distributed spatially. To rule this out, we analyzed distributions of neighbor locations  
200 (Fig 2D-2D’) for the data used to calculate attention maps (Fig 2C-2C’) These plots indicate  
201 where the 10 nearest neighbors of any given focal cell were likeliest to be found, bearing in  
202 mind that all analyzed populations were confluent (the cells fully tiled the 2D space).

203 Additionally, we indicate via thin red circular lines the annular region within which the bulk of the  
204 data points (5%-95%) lie as a function of radius (Figs. 2A-B’). The trained attention network  
205 weights are expected to be more reliable within this annular region than in external regions  
206 where data points were too sparse to ensure adequate modeling. In HUVECs, these neighbors  
207 appear to be evenly distributed within ~100 μm directly ahead of the focal cell. In MDCKs,  
208 however, the neighbor distribution showed a distinct gradient, with likelihood of neighbors  
209 peaking within an ~15 μm radius of the focal cell, and then dropping off by ~50 μm. However, in  
210 both cases neighbors are evenly angularly distributed about a given focal cell, meaning that the  
211 anisotropic attention maps are not due to irregular neighbor distributions, and must instead  
212 genuinely reflect spatial patterns of cellular attention.

213  
214  
215 Attention networks offer the flexibility to investigate both population and individual cell details, so  
216 we next raised the following question: is the closest nearest-neighbor always the most  
217 important? We addressed this by comparing the attention weights of only the single closest  
218 nearest-neighbor of each focal cell to attention maps showing the locations of only the most  
219 highly influential neighbors. Figs. 2E-2E’ are scatter plots of only those neighbors which are the  
220 single closest neighbor by radial distance to the focal agent, with focal agents consistent with  
221 those shown in Figs. 2C-2C’. The scatter points are colored by normalized attention weight.  
222 Figs. 2F-2F’ are histograms indicating the location of only the single highest weighted neighbor  
223 to those same focal cells. Here, we found that while the nearest neighbors themselves were  
224 uniformly distributed around a given focal cell, the relative importance of a given neighbor  
225 depended on both proximity and orientation, rather than proximity alone, and this trend applied  
226 to both of our archetypal tissues. When considered together, the kinds of analyses shown in Fig.  
227 2 can provide a unique, rich view of the interaction network and decision making within tissues.

228

229

230

231

### ***Learned important neighbors and neighborhood size***



232  
233  
234  
235  
236  
237  
238  
239  
240  
241  
242  
243  
244  
245  
246  
247  
248  
249  
250  
251  
252  
253  
254  
255  
256  
257

Tissues such as the epithelia and endothelia serve a barrier and structural function, meaning they must maintain integrity. To accomplish this, cells tile together to form confluent layers with no empty space<sup>41,42</sup>. In such tissues, the dominant signaling appears to be largely mechanical, with traction strains coupled through the substrate and cell-cell tension coupled through cell-cell adhesion proteins such as the cadherins<sup>43,44</sup>. In such barrier tissues, a focal cell only directly communicates with those neighbors to whom it is physically adhering, while longer range force coupling requires that mechanical information be relayed from cell to cell. Hence, confluent tissues acquire distinct packing geometries, with a key metric being the number of physically contacting nearest neighbors<sup>45,46</sup>. This raises an interesting question from the perspective of an attention network: what is the relative influence of contiguous neighbors versus neighbors farther afield?

We first investigated this using our MDCK epithelial model as significant biophysical data exist on cell-cell adhesion, packing structure, and force coupling. Here, we used cell nuclei to tile a tessellation, from which we calculated the total number of physically contiguous neighbors for each focal cell (*Methods*). These data are compiled in Fig. 3A, showing that MDCKs typically possess 5-6 contiguous nearest neighbors. The deep attention networks, however, may be flexibly structured to take input information from arbitrarily large groups of neighboring cells in order to predict turning motions of the focal agent. Thus, the network may have direct information pertaining to cells which the true biological agent may not physically contact. It is essential to remember this key distinction as larger network structures are explored. For all analyses shown for MDCK cells in Fig. 3, the corresponding neighbor distribution, closest neighbor, and highest weighted neighbor maps are shown in S3 Fig. *For the matching study with HUVEC endothelial cells, see S5 Fig.*

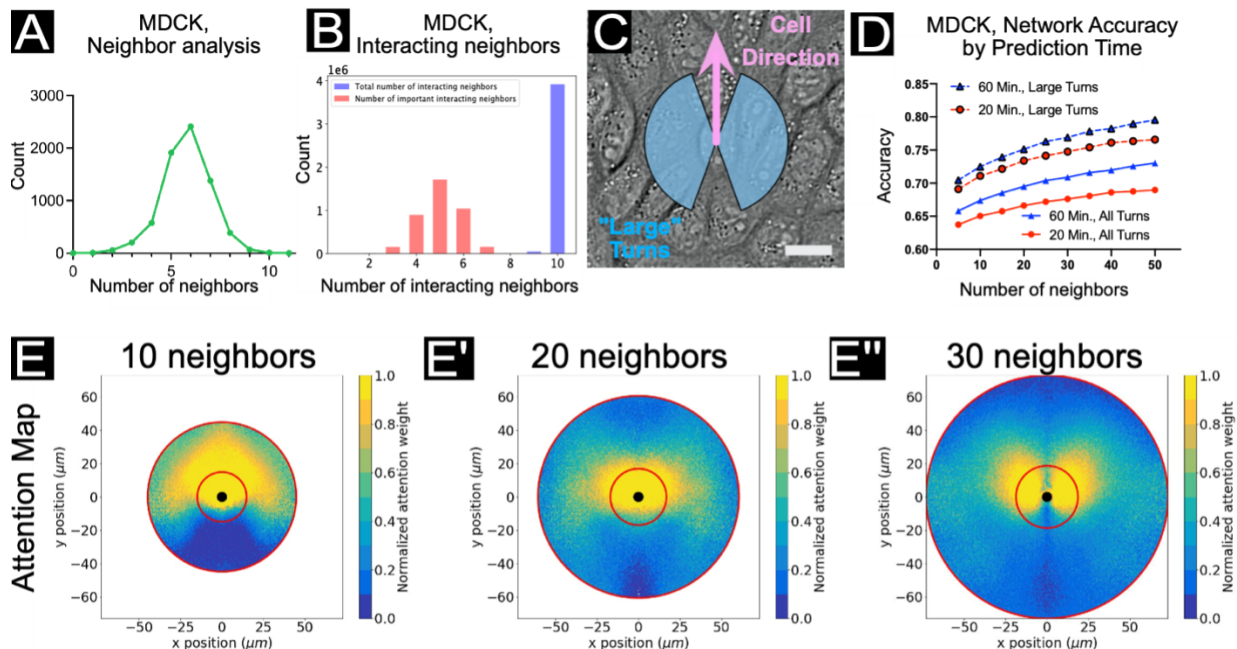

258

259 **Fig 3 Local vs. long-range interactions in MDCK epithelia (bulk regime).**

260 (A) The number of nearest neighbors based on an analysis of 1165 cells using the ImageJ/FIJI<sup>47</sup> BioVoxel plugin<sup>48</sup>  
261 (see *Methods*). A peak can be observed at 6 nearest neighbors.



262 (B) Histograms of total interacting cells (blue) and “important” interacting cells (red), as determined by a function  
263 utilizing the network aggregation weights ( $W$ ) to estimate the most influential neighbors to learned focal cell  
264 dynamics.  
265 (C) A snapshot of MDCK cells with blue region indicating the extent of “large” turns ( $\pm 20$ - $160^\circ$ ) according to the focal  
266 cell trajectory, as indicated by the pink arrow. Scale bar represents 20  $\mu\text{m}$ .  
267 (D) Network accuracy plots as prediction time and number of input neighbors is varied. Solid lines reflect accuracy  
268 scores for all turning angles in the focal agent trajectory; dashed lines reflect only large turns ( $\pm 20$ - $160^\circ$ , see C).  
269 Accuracy increases with both number of neighbors encompassed by the network and prediction time. Cell trajectory  
270 timesteps were fixed at 10 minutes.  
271 (E, E', E'') Attention maps for networks encompassing 10 (E), 20 (E'), and 30 (E'') neighbors. Plots shown here are  
272 analogous to Fig. 2C', with cell trajectory timestep of 10 minutes. As the number of neighbors taken into consideration  
273 by the network increases, a wider spatial range of interactions may be considered for forward motion prediction.  
274 **See S5 Fig. for the matching study in HUVEC endothelial cells.**

275  
276

277 By utilizing a function of the inverse of the typical weight,  $w_t$ , as in <sup>9</sup>:

278 
$$N_{total} = \frac{1}{w_t} = e^{-\sum_i w_i \log(w_i)}, \quad (2)$$

279 the most important neighbors (as learned by the network) to the turning dynamics may be  
280 estimated. The number of total and “important” interacting agents are shown in the histogram in  
281 Fig. 3B, wherein a peak in the number of important interacting agents may be observed at 5  
282 neighbors, indicating the bulk of influence to the learned dynamics even when the network has  
283 access to information from ten neighbors in total. These data add context to the findings in Fig.  
284 2 indicating that a combination of proximity and location determines relative influence for a given  
285 neighbor.

286

287 To assess the impact of providing trajectory information to the network from larger sets of  
288 nearest neighbors (structurally, more pairwise-interaction and aggregation subnetworks), we  
289 provide network accuracy results from networks spanning 5-50 neighbors in increments of 5  
290 (Fig. 3D, S4 Fig. for additional accuracy results) and representative attention plots from  
291 networks structured to account for 10, 20, and 30 nearest neighbors in total (Figs. 3E-E'').  
292 Additionally, we consider different prediction time intervals to explore how attention network  
293 accuracy relates to predicting 20 minutes vs. 60 minutes into the future. In all cases, we  
294 distinguish accuracy results across all turning motions of the focal cell (“all turns”) from accuracy  
295 results restricted to turning motions ranging from  $\pm 20$ - $160^\circ$  (“large turns”) (see Fig. 3C). This  
296 compensates for edge cases where a cell may turn only very slightly off the forward axis.  
297 Overall, we notice three distinct trends relating to neighborhood size, turn magnitude, and  
298 temporal variables and discuss each aspect of Fig. 3D in turn here.

299

300 With respect to prediction time steps, we observed a clear trend in both MDCK epithelia and  
301 HUVEC endothelia where the network accuracy improved with increasing time-steps, with data  
302 from either 20 min or 60 min forward predictions shown (red and blue lines in Fig. 3D; see  
303 attention maps in S6 Fig.). While modest ( $\sim 5$ - $7\%$  for MDCK), we hypothesize that this trend  
304 reflects the relatively high persistence of confluent cells in epithelia and endothelia (S7D Fig.).  
305 More specifically, predicting ahead over shorter time steps (e.g. 20 minutes) is more susceptible  
306 to fluctuations in the cellular dynamics and noise in the tracking data, while predicting over  
307 longer timesteps (e.g. 60 minutes) should act to temporally filter out these fluctuations and  
308 better emphasize the directed nature of cell migration in these cell types. Additionally, cells will  
309 undergo smaller displacements over short time steps, likely resulting in more ambiguous cases  
310 at the logit boundary ( $0^\circ$ ).

311

312 To explore the importance of turning angles and the logit boundary, we compared accuracy data  
313 for ‘all turns’ versus that for ‘large turns’, as defined earlier and highlighted in Fig. 3D. This  
314 comparison clearly showed improved accuracy for larger versus smaller turns. Again, this is due  
315 to smaller turns being closer to the logit boundary ( $0^\circ$ ) and more difficult to predict. This finding  
316 was borne out across all experiments presented here. Further, the concept of turn magnitude  
317 can clarify the relationship between cell type and accuracy as certain cell types favor much  
318 smaller turns than others. To emphasize this, we plotted a radial histogram of focal turn angles  
319 in S7 Fig., where it is clear that HUVEC endothelial cells favor smaller turning angles (higher  
320 persistence) than MDCK epithelial cells, with MSD plots for relevant cell types (Fig. 1E). This  
321 explains why the network is more accurate at predicting MDCK vs. HUVEC behaviors, as  
322 HUVEC motion will lie closer to the logit boundary.

323 Overall, the number of neighbors assessed by the network was the most influential variable on  
324 network accuracy—as the network was structured to account for larger sets of nearest  
325 neighbors, the accuracy increased monotonically (Fig. 3D, S5D Fig.). This trend was also true  
326 across all epithelial and endothelial datasets we considered, with varying strength. For instance,  
327 MDCK attention maps were more strongly affected by neighborhood size than HUVEC maps  
328 were (Fig. 3D vs. S5D). To more clearly capture this, we compared attention maps for three  
329 different neighborhood sizes (10, 20, and 30 nearest neighbors; NN) in Figs. 3E-E” for MDCK  
330 cells. Increasing the neighborhood size from 10NN to 30NN resulted in a shift from a forward  
331 cone of influence to more of an axially symmetric lobular structure. This shift is further  
332 emphasized by the associated scatter plots of closest nearest neighbors and highest weighted  
333 neighbors (S3A-A”, S3B-B”, S3C-C” Figs., respectively).

334  
335  
336

### 337 **Context of network accuracy for collective cell migration**

338

339 The link between network accuracy and neighborhood size reflects an important and counter-  
340 intuitive design consideration since the cells we analyzed here, unlike fish, only have direct,  
341 physical awareness of their true contiguous nearest neighbors. Hence, while the accuracy  
342 increases with increasing number of nearest neighbors accounted for by the network, as more  
343 information can be obtained over a wider spatial range, an individual cell has a more limited  
344 *biological* sensing regime. Thus, an increase in accuracy with increasing neighborhood size  
345 may not reflect biological realities of the system, and may instead result from the network  
346 learning more longer-range interactions. Given this, it may be helpful to configure attention  
347 networks to match the desired biological questions or constraints rather than exclusively  
348 pursuing accuracy.

349

350 Typically, the objective is to obtain as high an accuracy result as possible for a given task for  
351 most deep learning problems. Here, by contrast, the objective is more nuanced: first, we are not  
352 interested in specifically using the predicted turning logit, but rather contrive the dynamics  
353 prediction task specifically in order to recover collective rules from the trained network weights  
354 in the form of interpretable attention maps. That is, the network only has to be “good enough” to  
355 learn the essential collective dynamics. Second, certain systems may be more challenging to  
356 learn, such as the HUVECs which tend towards small turning angles.

357

358 To account for these two difficulties, we compare the standard network accuracies to accuracies  
359 derived from a network trained using shuffled trajectories: a difference in accuracy values  
360 indicates that the network captures collective phenomena. For MDCKs, the standard training  
361 accuracy was 64.3% for all turns, 70.1% for large turns, compared to the shuffled training  
362 accuracy which was 59.1% for all turns, 62.5% for large turns. For HUVECs, the standard

363 training accuracy was 58.0% for all turns, 58.5% for large turns, compared to the shuffled  
364 training accuracy which was 53.4% for all turns, 53.1% for large turns. While we consider this  
365 accuracy increase to indicate learned collective dynamics, we hope that our work will encourage  
366 the development of richer dynamic prediction tasks and metrics to this end.

367  
368 In addition to network structure modifications, we also assessed the importance of (1) sampling  
369 rate (time intervals between data points), and (2) the choice of input variables. To explore  
370 sampling rate effects, we compared our prior networks trained on data captured at 10 min/frame  
371 to new networks trained from scratch on data sub-sampled at 20 or 30 min/frame (S8-9 Figs. for  
372 MDCK and HUVECs, resp.) In these experiments, the accuracy increases as the time delay is  
373 increased, most likely due to the access of the network to longer total time intervals due to the  
374 use of the same number of historical time steps. Finally, we blind the network to focal tangential  
375 acceleration and neighbor accelerations (S10 Fig.), that is, we exclude these parameters as  
376 input to the network. The accuracy results are not significantly impacted by the exclusion of  
377 acceleration parameters. When we consider network performance in a complex system like an  
378 epithelium, we see that no single modification—temporal variables, neighborhood size, turn  
379 binning—accounts for more than a 10% improvement in performance at best, while all network  
380 conditions outperformed a random guess and generally presented similar overall trends, or  
381 rulesets.

382  
383  
384 As a final note, we emphasize that it is crucial to consider context when comparing accuracy  
385 results. For data taken from the same cell types under the same experimental conditions,  
386 increased accuracy results can provide useful information about which input variables may  
387 strongly impact turning dynamics. However, accuracy comparisons may provide less insight  
388 across cell types, such as in the case of HUVEC endothelial cells which have narrower turn  
389 angle distributions than MDCK epithelial cells (see S7 Fig.), or differences in prediction task,  
390 such as short- vs. long-time prediction intervals, which can modify which neighbors are likely to  
391 influence focal agent dynamics. While we did perform parameter sweeps over key variables  
392 such as forward prediction time and number of neighbors considered, it was necessary to  
393 establish baseline conditions to present our findings. For all standard epithelial and endothelial  
394 experiments, unless otherwise stated, 10 total nearest neighbors were accounted for by the  
395 network (i.e. 10 pairwise-interaction subnetworks, 10 aggregation subnetworks), the time  
396 between trajectory points was 10 minutes, the prediction time interval was 20 minutes, and no  
397 parameter blinding was performed. Further, we restricted our core analyses to these standards  
398 in order to best learn temporally local cell dynamic “decisions”—with 20 minutes corresponding  
399 to the approximate time it takes these cells types to move approximately half a nuclear-length  
400 within a confluent ensemble based on our data (Fig. 1D) -- and additionally to sufficiently  
401 encompass spatially local neighboring cells, as a function of classical neighbor analyses as in  
402 Fig. 3A.

403  
404

#### 405 ***Limiting cases: mesenchymal, metastatic cells lack coordinated collective rules***

406  
407 Our goal is to study collective behaviors in cells, so a natural question which arises is: how do  
408 these networks respond to cell types with apparently uncoordinated behavior, and is there an  
409 underlying behavioral mode? We explored this using metastatic breast cancer cells as a  
410 hallmark in many metastatic cancers is that cells undergo an epithelial-to-mesenchyme  
411 transition, effectively transitioning from more collective, epithelial cells to more individualistic

412 mesenchymal cells<sup>7</sup>. We explored this here using the MDA-MB-231 cell line: a well-studied,  
413 highly aggressive triple-negative breast cancer (TNBC) cell type, which exhibits spindle-shaped  
414 morphology, and lacks strong cell-cell adhesion<sup>49–51</sup>. In contrast to the highly collective MDCK  
415 and HUVEC lines, the uncoordinated MDA-MB-231s function more like a negative biological  
416 control.

417  
418 The attention plots and accuracy scores for the MDA-MB-231s are shown in Fig. 4. The  
419 attention contour plot in Fig. 4A highlights a radially symmetric influence regime around the focal  
420 agent, indicating that dynamics are more likely influenced by proximity alone (possibly a  
421 repulsion zone) than directed coordination. The histogram of neighbor locations (Fig. 4B)  
422 confirms that the data are relatively consistently distributed about the focal cell, while the scatter  
423 plot of the closest neighbor locations, colored by normalized attention weights (Fig. 4C) and  
424 histogram of highest weighted neighbors (Fig. 4D) further emphasize the circular influence  
425 region lacking any more specific spatial signature. Here, the prediction time interval was 20  
426 minutes, the time between trajectory points was 5 minutes, and 10 nearest neighbors in total  
427 were accounted for by the network structure.

428  
429

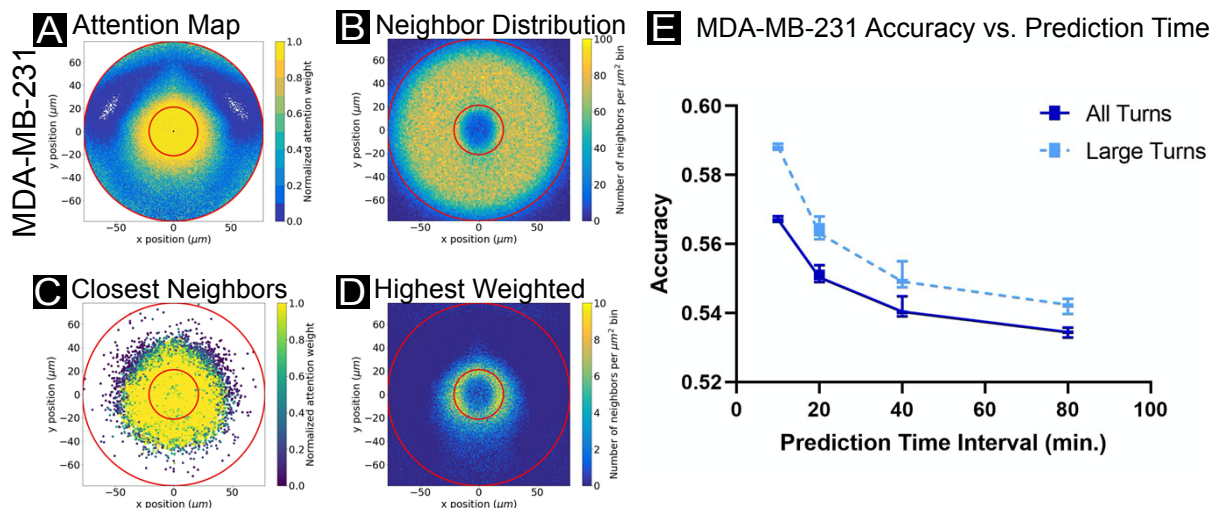

430

431 **Fig 4 Breaking coordination: attention in metastatic cancer cell line MDA-MB-231.**

432 (A) Normalized attention weight contour plot, (B) neighbor location histogram, (C) closest neighbor scatter plot, as  
433 colored by normalized attention weights, and (D) histogram of highest weighted neighbors, with all plots analogous to  
434 those in Figures 2 and 3. Results shown for MDA-MB-231 cells with cell trajectory points taken every 5 minutes, and  
435 networks encompassing 10 neighbors with 20 minute prediction times. This cancer line functions as a control, as the  
436 cancer cells are highly uncoordinated, resulting in nearly equal attention weight applied to local neighbors in all  
437 directions.

438 (E) Network accuracy plots as prediction time interval is varied, aggregated over networks accounting for 5-50  
439 neighbors in increments of 5. Solid lines reflect accuracy scores for all turning angles in the focal agent trajectory;  
440 dashed lines reflect only large turns ( $\pm 20-160^\circ$ ). Accuracy decreases with increasing prediction interval and varies  
441 little as a function of neighbors observed by the network. Cell trajectory timesteps were fixed at 5 minutes.

442

443

444 As individual MDA-MB-231 cells lack cell-cell adhesion-mediated coordination, and exhibit low-  
445 persistence trajectories (S7 Fig.), the ability of the network to predict future turning decreases  
446 with increasing prediction time interval (Fig. 4E). This is opposite the trend from more collective



447 and persistent cell types where accuracy increases with increasing prediction time interval and  
448 is likely a hallmark of poorly coordinated cells. Additionally, accounting for larger numbers of  
449 nearest neighbors does not obviously impact the network accuracy results. Again, since the  
450 agents are highly uncoordinated, the range of interacting cells does not affect predictive  
451 accuracy.

### 452 ***Biophysical variations: tissue edge vs. bulk domains and age.***

453  
454 Finally, we explore how collective cell migration rules vary across a large tissue and in different  
455 biophysical contexts. There is a growing appreciation in tissue biology that cells within a single  
456 tissue can exhibit different behaviors based on their locations within the tissue--supracellularity<sup>2</sup>.  
457 These differences can arise from local biological or biophysical properties, such as density-  
458 mediated jamming and contact inhibition of locomotion and proliferation<sup>44,45</sup>. Here, we explore  
459 these questions in two parts using our MDCK epithelial model. First, we examine the collective  
460 rules found in epithelial cells near either the outer boundary of a growing tissue or deep in the  
461 bulk of the tissue. Next, we look at how the rules change in response to maturation of the tissue  
462 and concomitant biophysical changes. Accuracy plots for the following data can be found in S11  
463 Figs.

464  
465 To characterize 'edge vs. bulk' dynamics, we defined analysis zones to demarcate cell  
466 trajectories in the bulk and edge regions, excluding those cell trajectories too close to the free  
467 boundaries to avoid biases caused by reduction in neighbors (see *Methods*). Independent deep  
468 attention networks were trained for each zone. The attention contour plot, closest neighbor  
469 location scatter plot, and highest weighted neighbor histogram from Fig. 2 are shown again in  
470 Figs. 5B-D, and represent the dynamics in the bulk region. Neighbor location histograms are  
471 shown in S12 Fig. Figs. 5B'-D' are the same visualizations for data from the edge region of the  
472 tissue. Structurally, the key difference in these attention maps is the relatively much higher  
473 importance of lateral neighbors for cells at the expanding edges of a tissue. The neighbor  
474 location histogram plots (see S12 Fig.) confirm that this difference is *not* due to a *lack* of cells in  
475 front of the focal cell. Rather, we hypothesize that agents directly in front of the focal agent near  
476 the edge of the tissue tend to have less influence over the turning behavior because as edge  
477 cells expand outward, the forward agents are more likely to displace outward, leaving space for  
478 the focal agent to follow yet not substantially impacting turning decisions overall where lateral  
479 cell-cell adhesion likely mechanically influences cell behavior. In both cases, agents forward-  
480 and-to-the-sides impact focal cell turning behaviors, with little impact from rear neighbors.

481

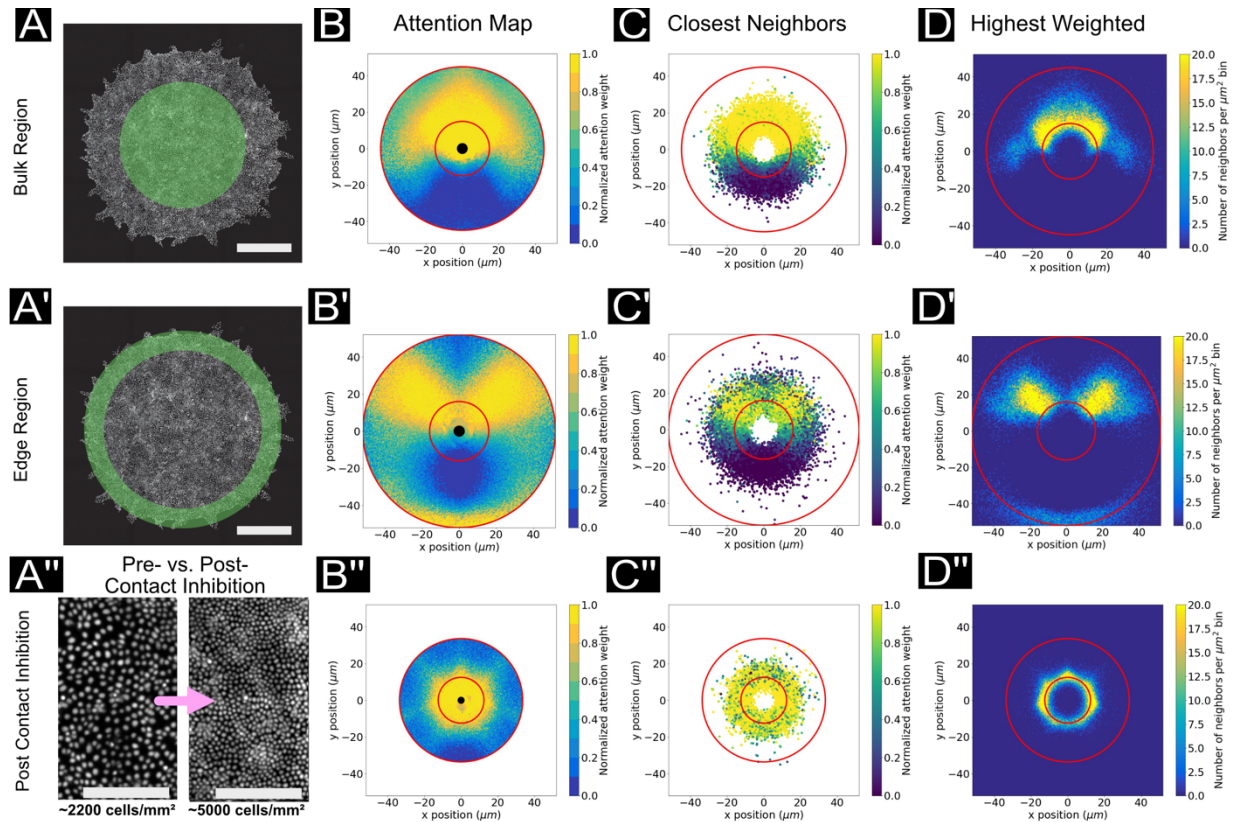

482

483 **Fig 5 Biophysical modifications and attention.**

484 (A, A') For these experiments, cell trajectory data is extracted from either the bulk region (A) or the edge region (A') of  
 485 the tissues. Scale bar represents 1 cm.

486 (A'') Representative nuclei images of tissues before and after contact inhibition. Scale bars represent 200  $\mu\text{m}$ .

487 (B\*, C\*, D\*) Attention map, closest neighbors scatter plot and histogram of highest weighted points, as before.

488 (B, C, D) Network trained on MDCK cell trajectories taken from a circular ROI in the center of an expanding tissue,  
 489 prior to contact inhibition. Plots are representative of the bulk region (see *Methods*).

490 (B', C', D') Network trained on MDCK cell trajectories taken from an annulus along the outer region of a circular  
 491 expanding tissue, prior to contact inhibition. Plots are representative of the edge region of the tissue (see *Methods*).

492 (B'', C'', D'') Network trained on MDCK cells in the bulk region, after contact inhibition. Plots are representative of a  
 493 jammed tissue (see *Methods*).

494

495 Having varied cell context across the tissue, we then varied cell context with respect to time and  
 496 crowding. As an epithelium matures, it undergoes multiple rounds of cell division that drive the  
 497 bulk density higher until it reaches a critical point where cell division is inhibited and migration  
 498 slows due to jamming and contact inhibition of proliferation and migration signaling<sup>14,45</sup>, S4  
 499 Movie. To study this here, we compared attention behaviors for cells in the bulk of a relatively  
 500 'young' tissue to those of a more mature tissue. The four attention plots associated with the  
 501 post-contact-inhibition case are shown in Figs. 5B''-D'' for comparison to the first row of plots  
 502 (Figs. 5B-D) which are representative of tissues prior to contact inhibition. These attention  
 503 contour plots of mature, dense epithelia (Fig. 5B'') demonstrate a much shorter range zone of  
 504 influence, reflecting the increased packing and reduced motility for cells in these tissues. The  
 505 neighbor location histogram (Fig. 5C'', red lines) also confirms the denser packing of the tissue:  
 506 more nearest neighbors proportionally lie within a thin annulus near the focal agent. Finally,  
 507 beyond simply reducing the interaction length, focal cells in high density tissues uniformly

508 distribute their attention in all directions (Fig. D’), in stark contrast to the biased attention  
509 patterns observed in the earlier, more motile state of the tissue.  
510

## 511 **Discussion**

512

### 513 ***Basic rules of collective cell attention can be learned from trajectory data***

514

515 We demonstrated that deep attention networks can learn core rules of collective cell behaviors  
516 given only cellular trajectory data, offering a complementary approach to traditional biophysical  
517 and statistical methods for analyzing collective cell behaviors. In blood vessel endothelial cells  
518 (HUVEC), where strong leader-follower dynamics are visually observable, the attention maps  
519 emphasized the overwhelming importance of cells directly in front of the focal cell, rather than  
520 lateral or rearward neighboring cells. Again, these results do not follow from either classical  
521 correlation analyses or biological morphology and protein localization data.<sup>40</sup> In epithelial cells  
522 (MDCK), where cell-cell interactions are more complex and tend to result in large-scale  
523 correlated motion domains within the tissue, the influence region was much broader and  
524 encompassed neighboring cells forward and to the sides, with minimal influence from cells  
525 behind the focal agent. In more individual, metastatic breast cancer cells (MDA-MB-231), which  
526 are highly uncoordinated and function as a biological control, attention maps reflected a lack of  
527 influence in any particular direction in contrast to the collective HUVEC and MDCK cells, with  
528 influence confined to a small region in close proximity to the focal cell. Our visual attention map  
529 results, increased accuracy scores compared to networks trained on shuffled trajectories, and  
530 accuracy trends as a function of network modifications – such as increases in prediction time  
531 intervals - indicate that the deep attention networks are effectively recovering collective  
532 influence regions.

533

### 534 ***Limitations of existing metrics and network design.***

535

536 Recall that our approach draws on tools originally developed for analyzing schooling fish, and  
537 so we note that translation to complex, orders-of-magnitude larger populations of interacting  
538 cells is not perfect. In particular, our work highlights the need for novel metrics and  
539 performance benchmarks to validate network success. We utilize the deep attention network  
540 structure to both capture rich dynamic relationships and expose meaningful attention weights for  
541 interpretation. Establishing more rigorous criteria to assess if meaningful collective behaviors  
542 are captured would be of great value towards transitioning similar techniques into standard  
543 practice, such as: (1) the development of a suite of biologically-grounded perceptual range  
544 targets for canonical cell types; (2) establishment of different learning goals beyond simple  
545 turning decisions; and (3) application of new network architectures and strategies such as  
546 reinforcement learning.

547

548 Deep attention network accuracies may be augmented by providing information about the  
549 system which is inaccessible to the biological agent, such as dynamic information about cells  
550 beyond the focal cell’s physical sensing boundaries (Fig. 3D), or the use of long-term historical  
551 data (S8-9 Figs.). Moreover we are applying a tool originally developed for the analysis of  
552 independent, physically separated agents (e.g. fish) with wide, non-contact based perceptual  
553 fields (vision and pressure wave detection) to a 2D confluent monolayer in which cells are  
554 physically contacting one another. Thus, network inputs, network structure, and metrics of  
555 success must be carefully designed to ensure the learned dynamics are reflective of the  
556 biological system.

557

558

559 ***Concluding remarks***

560

561 Here, we characterize the application of deep attention networks to the recovery of cell-cell  
562 influence within a collective setting. We apply the technique to data collected from well-studied  
563 epithelial cell lines with distinct collective behaviors and in distinct biophysical settings. We  
564 compare accuracy results as a function of different training, data sampling, and sensory range  
565 settings and explore influence regions exposed by derived attention maps. We highlight the  
566 need for improved network structures and performance metrics; however, we are optimistic  
567 about the potential for deep attention networks and related machine learning methods to reveal  
568 collective rules beyond the capabilities of classical group analysis methods.



569 **Methods.**

570 ***Ethics statement***

571 Our study involved standard mammalian cell type the use of which is approved via Princeton  
572 IBC committee, Registration #1125-18. MDCK-II wild-type and Ecad:RFP cells were a gift from  
573 the Nelson Laboratory at Stanford University. HUVEC cells expressing VE-cadherin were a gift  
574 from the Hayer Laboratory at McGill University. Wild-type HUVEC cells were purchased through  
575 Lonza. MDA-MB-231 human breast cancer cells were a gift from the Nelson Laboratory at  
576 Princeton University.

577 ***Cell culture***

578 MDCK-II cells were cultured in low glucose DMEM supplemented with 10% Fetal Bovine Serum  
579 (Atlanta Biological) and penicillin/streptomycin as done previously<sup>14</sup>. HUVEC endothelial cells  
580 were cultured using the Lonza endothelial bullet kit with EGM2 media according to the kit  
581 instructions. MDA-MB-231 human breast cancer cells were cultured in DMEM/F12 (1:1) media<sup>52</sup>  
582 (Thermo Fisher Scientific, Life Technologies, Item #11330-032) supplemented with 10%  
583 Fetal Bovine Serum (Atlanta Biological) and penicillin/streptomycin. All cell types in culture were  
584 maintained at 37°C and 5% CO<sub>2</sub> in humidified air.

585 ***Tissue preparation***

586 Tissue samples were grown in 3.5-cm glass-bottomed dishes coated with an appropriate ECM.  
587 To coat with ECM, we incubated dishes with 50 µg/mL in PBS of either collagen-IV (MDCK,  
588 MDA-MB-231; Sigma) or bovine fibronectin (HUVEC; Sigma) for 30 min 37°C before washing 3  
589 times with DI water and air drying the dishes.

590 To pattern consistent circular tissues, ~3 µL of suspended cells were seeded into 9 mm<sup>2</sup> silicone  
591 microwells within each dish as described in [44] which allowed confluent monolayers to form.  
592 MDCK-II cells were seeded at a density of 1.8x10<sup>6</sup> cells/mL; HUVEC cells were seeded at a  
593 density of 0.8x10<sup>6</sup> cells/mL; and MDA-MB-231 cells were seeded at a density of 3.0x10<sup>6</sup>  
594 cells/mL. We added 4 µL of suspended cells in media to each microwell, allowed them to  
595 adhere in the incubator (30 min for MDCK, 1 hr for HUVECs, 2 hrs for MDA-MB-231s), added  
596 media and returned them to the incubator for 16 hrs prior to imaging. For contact inhibition  
597 samples, MDCK-II cells were seeded at a density of 4.2x10<sup>6</sup> cells/mL on 20mm<sup>2</sup> silicone  
598 microwells. After 30 min. incubation, tissues were continuously over 48 hrs to capture both pre-  
599 contact inhibition and post-contact inhibition state.

600 ***Fluorescent imaging***

601 We used the live nuclear dye NucBlue (ThermoFisher; a Hoechst 33342 derivative) with a 30  
602 min incubation for nuclear labeling on standard MDCK, HUVEC, and MDA-MB-231 tissues and  
603 imaged with a DAPI filter set. For MDCK data collected for pre- and post-contact inhibition  
604 experiments, nuclear labels were reproduced using a convolutional neural network trained to  
605 reconstruct nuclei features from 4x phase contrast images of cells. Complete documentation  
606 including code and trained network weights for this tool may be referenced in <sup>39</sup>. Media was  
607 swapped and silicone microwell stencil was removed prior to imaging. Cadherin imaging was  
608 performed using conventional epifluorescence microscopy on a Nikon Ti2 equipped with a YFP  
609 filter set (HUVEC VE-Cadherin) and an RFP filter set (MDCK E-cadherin).

## 610 ***Image Acquisition***

611 MDCK, HUVEC, and MDA-MB-231 data was collected on a Nikon Ti2 automated microscope  
612 equipped with either a 4X/0.15 phase contrast (HUVEC) objective or 10X/0.3 phase contrast  
613 objective (MDCK, MDA-MB-231), and a Qi2 sCMOS camera (Nikon Instruments, 14-bit). An  
614 automated XY stage, a DAPI filter set, and a white LED (Lumencor SOLA2) allowed for  
615 multipoint phase contrast and fluorescent imaging. MDCK and HUVEC data was collected at 10  
616 min/frame, while MDA-MB-231 were given 5 min/frame, with temporal resolution increased for  
617 the MDA-MB-231 cells to improve tracking quality. Contact inhibition data were collected at 20  
618 min/frame for 48 hours. The first 60 frames and last 60 frames are used as pre and post contact  
619 inhibition samples, respectively.

620 All imaging was performed at 37°C with 5% CO<sub>2</sub> and humidity control. Exposures varied, but  
621 were tuned to balance histogram performance with phototoxic risk. Data with any visible sign of  
622 phototoxicity (blebbing, apoptosis, abnormal dynamics) were excluded entirely from training.

## 623 ***Timelapse Pre-Processing and Tracking***

624 Timelapse movies of individual expanding tissues were processed using ImageJ/FIJI<sup>47,53</sup> prior to  
625 performing cell tracking via background subtraction and contrast enhancement. Tracking was  
626 performed using the TrackMate plugin<sup>54</sup>, with “bulk” vs. “edge” tissue regimes initially  
627 differentiated using a circular ROI concentric with the tissue with radial extent 80% of the tissue  
628 radius. Cell trajectories were generated and shortened tracks were excluded to account for  
629 boundary effects: for instance, cells from the bulk tissue regime migrating into the edge regime.  
630 Trajectories were normalized, by translation to the trajectory arena center and scaling, and  
631 smoothed as in [9], with cell velocities and accelerations determined using finite differences. The  
632 bulk spatial regimes were further reduced by 20% prior to training, while the edge spatial  
633 regimes were reduced by 10% of the maximal tissue growth prior to training, again to mitigate  
634 edge effects. When trajectories were subsampled, cell trajectory positions were sliced to use  
635 every  $n$ th value in time; when tissues at different growth stages were analyzed; full trajectory  
636 datasets were sliced to include data spanning the required time ranges.

637 The protocol for determining nearest neighbors, velocities and accelerations, turning angles,  
638 and shuffled trajectories was identical to the protocol in [9]; however, the size of the training  
639 dataset was reduced in order to increase the size of the validation and test datasets  
640 (50%/30%/20% by timelapse splits).

## 641 ***Network Training and Analysis***

642 The attention network structure, logit probabilities, loss function, and training hyperparameters  
643 were identical to those described in [9], here again implemented using Keras with a TensorFlow  
644 backend<sup>55,56</sup>, yet with a standard 1000 epochs per training cycle and early stopping. The  
645 structure of the deep attention network extends to include  $n$  pairwise-interaction subnetworks  
646 and  $n$  aggregation subnetworks, where  $n$  is the number of nearest neighbors accounted for by  
647 the network. The standard value of  $n$  is 10 unless otherwise specified. Sample training loss plots  
648 are shown in S1 Fig. Training was performed on a desktop using an NVIDIA GeForce GTX  
649 1070 Ti GPU or in a cluster environment with an NVIDIA Tesla P100 GPU. As in Francisco J. H.  
650 Heras et al., the attention network logit was used to determine a logit indicating whether the  
651 focal agent will turn left or right after a fixed time interval. The network input consisted of asocial  
652 information, specifically the speed,  $v$ , tangential acceleration,  $a_{\parallel}$  and normal acceleration,  $a_{\perp}$ ;  
653 and social information pertaining to a set number of nearest neighbors to the focal agent,

654 specifically relative position,  $x_i$  and  $y_i$ , velocity,  $v_{i,x}$  and  $v_{i,y}$ , and accelerations,  $a_{i,x}$  and  $a_{i,y}$ . We  
655 performed experiments “blinding” the model to the focal tangential acceleration and neighbor  
656 accelerations (both normal and tangential), such that these variables would not be included as  
657 input to the model, yet no significant effect was observed on accuracy (see S7 Fig).

658 All plots were generated using Python unless otherwise indicated. The representative cell  
659 trajectories in Fig. 1A-C were generated using the TrackMate plugin ImageJ. The mean speeds,  
660 MSD and persistence plots in Fig. 1D-E were generated using TrackMate trajectories, with  
661 persistence calculated as (displacement)/(traveling distance) and MSD calculated by MATLAB  
662 script(MSD analyzer). The cell position snapshot in Fig. 1F plots a single random focal cell,  
663 indicated by a central ellipse, and relative positions in space of its neighbors as a function of  
664 nuclei centroids, colored by normalized attention weight output by the network according to their  
665 trajectory data. Neighboring cell direction is indicated by elongated axis of the ellipse, and nuclei  
666 centroids were used to generate Voronoi cells.

667 Attention maps (e.g. Fig. 2A) were generated by selecting 10,000 random focal agents in the  
668 test set and interpolating the attention weights assigned to every neighbor of every focal agent  
669 to produce a contour plot. The radius of innermost black circle indicates the smallest radial  
670 distance from any focal agent to its closest neighbor. The thin red circles indicate the region in  
671 which the bulk of the neighboring points lie in space. The neighbor positions are converted into  
672 radial distance values to determine radii between which 5%-95% of the data falls; these radii are  
673 indicated via the thin red lines on both attention maps and neighbor distribution maps. The latter  
674 (e.g. Fig. 2B) were generated using the same 10,000 focal agents and their neighbors and  
675 binning their  $(x, y)$  coordinates to produce a 2D histogram. Closest neighbor location plots (e.g.  
676 Fig. 2C) were produced by utilizing the same 10,000 focal agents yet sorting their neighbors by  
677 radial distance to the focal agent; only those closest neighbors were plotted in space, and points  
678 were colored by normalized attention weight. Highest weighted neighbor histograms (e.g. Fig.  
679 2D) were generated using the same 10,000 focal cells, yet only binning the  $(x, y)$  coordinates for  
680 the neighbor with the highest weight for each focal cell. The focal turning angle radial histogram  
681 (S7 Fig.) was generated using the same 10,000 focal cell trajectories and binning angles by  $10^\circ$ .

682 Neighbor analyses were performed using the ImageJ BioVoxel toolbox<sup>48</sup>. First, cell boundary  
683 binary images were obtained by processing nuclear fluorescence data using the ‘Find Maxima’  
684 routine in ImageJ with ‘segmented particle’ output. Next, we used BioVoxel neighbor analysis  
685 with the ‘particle neighborhood’ approach and a neighborhood radius of 2 pixels. Interacting  
686 neighbor plots (e.g. Fig. 3B) were produced as described previously<sup>9</sup>, with the important  
687 neighbors recovered as a function of the inverse of the typical attention weight (Equation 2) as  
688 presented previously<sup>57</sup>. All accuracy results are reported on the complete test set.

#### 689 **Code and Dataset Availability:**

690 All code used for pre-processing data, training/validating/testing the model, and post-processing  
691 for plot and figure generation can be found on GitHub at:

692 [https://github.com/CohenLabPrinceton/Attention\\_Networks](https://github.com/CohenLabPrinceton/Attention_Networks)

693 Experimental data in the form of timelapse movies (TIFF files) and cell tracks (XML files) for  
694 HUVEC, MDCK (bulk and edge regions), and MDA-MB-231 cells may be found on Zenodo<sup>58</sup> at:

695 <http://doi.org/10.5281/zenodo.4959169>

696 **Acknowledgements**

697 Partial funding support was provided by the National Institutes of Health through an NIGMS  
698 R35-133574-03 MIRA grant (J. M. L., K. S., D.J.C.)  
699



## References.

- 700 1. Haeger, A., Wolf, K., Zegers, M. M. & Friedl, P. Collective cell migration: Guidance  
701 principles and hierarchies. *Trends Cell Biol.* **25**, 556–566 (2015).
- 702 2. Shellard, A. & Mayor, R. Rules of collective migration: From the wildebeest to the neural  
703 crest: Rules of neural crest migration. *Philosophical Transactions of the Royal Society B:*  
704 *Biological Sciences* **375**, (2020).
- 705 3. West, S. A., Fisher, R. M., Gardner, A. & Kiers, E. T. Major evolutionary transitions in  
706 individuality. *Proceedings of the National Academy of Sciences of the United States of*  
707 *America* **112**, 10112–10119 (2015).
- 708 4. Friedl, P. & Gilmour, D. Collective cell migration in morphogenesis, regeneration and  
709 cancer. *Nat. Rev. Mol. Cell Biol.* **10**, 445–457 (2009).
- 710 5. Deisboeck, T. S. & Couzin, I. D. Collective behavior in cancer cell populations. *BioEssays*  
711 **31**, 190–197 (2009).
- 712 6. Gallardo, V. E. *et al.* Phenotype-driven chemical screening in zebrafish for compounds  
713 that inhibit collective cell migration identifies multiple pathways potentially involved in  
714 metastatic invasion. *DMM Dis. Model. Mech.* **8**, 565–576 (2015).
- 715 7. Friedl, P., Locker, J., Sahai, E. & Segall, J. E. Classifying collective cancer cell invasion.  
716 *Nat. Cell Biol.* **14**, 777–783 (2012).
- 717 8. Zitterbart, D. P., Wienecke, B., Butler, J. P. & Fabry, B. Coordinated movements prevent  
718 jamming in an emperor penguin huddle. *PLoS One* **6**, 5–7 (2011).
- 719 9. Heras, F. J. H., Romero-Ferrero, F., Hinz, R. C. & de Polavieja, G. G. Deep attention  
720 networks reveal the rules of collective motion in zebrafish. *PLOS Comput. Biol.* **15**,  
721 e1007354 (2019).
- 722 10. Cavagna, A. *et al.* Scale-free correlations in starling flocks. *Proc. Natl. Acad. Sci. U. S. A.*  
723 **107**, 11865–11870 (2010).
- 724 11. Ballerini, M. *et al.* Interaction ruling animal collective behavior depends on topological  
725 rather than metric distance: Evidence from a field study. *Proc. Natl. Acad. Sci. U. S. A.*  
726 **105**, 1232–1237 (2008).
- 727 12. Poujade, M. *et al.* Collective migration of an epithelial monolayer in response to a model  
728 wound. *Proc. Natl. Acad. Sci. U. S. A.* **104**, 15988–15993 (2007).
- 729 13. Henkes, S., Kostanjevec, K., Collinson, J. M., Sknepnek, R. & Bertin, E. Dense active  
730 matter model of motion patterns in confluent cell monolayers. *Nat. Commun.* **11**, 1–21  
731 (2020).
- 732 14. Heinrich, M. A. *et al.* Size-dependent patterns of cell proliferation and migration in freely-  
733 expanding epithelia. *Elife* (2020). doi:10.7554/elife.58945

- 734 15. Doxzen, K. *et al.* Guidance of collective cell migration by substrate geometry. *Integr. Biol.*  
735 (*United Kingdom*) **5**, 1026–1035 (2013).
- 736 16. Vedula, S. R. K. *et al.* Emerging modes of collective cell migration induced by geometrical  
737 constraints. *Proc. Natl. Acad. Sci. U. S. A.* **109**, 12974–12979 (2012).
- 738 17. Angelini, T. E. *et al.* Glass-like dynamics of collective cell migration. **108**, (2011).
- 739 18. Alert, R. & Trepap, X. Physical Models of Collective Cell Migration. *Annu. Rev. Condens.*  
740 *Matter Phys.* **11**, 77–101 (2020).
- 741 19. Cichos, F., Gustavsson, K., Mehlig, B. & Volpe, G. Machine learning for active matter.  
742 *Nat. Mach. Intell.* **2**, 94–103 (2020).
- 743 20. Hou, H. *et al.* Using deep reinforcement learning to speed up collective cell migration.  
744 *BMC Bioinformatics* **20**, 1–10 (2019).
- 745 21. Zhang, Y., Chai, Z., Sun, Y. & Lykotrafitis, G. A deep reinforcement learning model based  
746 on deterministic policy gradient for collective neural crest cell migration. *arXiv* (2020).
- 747 22. Pepperkok, R. & Ellenberg, J. High-throughput fluorescence microscopy for systems  
748 biology. *Nature Reviews Molecular Cell Biology* **7**, 690–696 (2006).
- 749 23. Starkuviene, V. & Pepperkok, R. The potential of high-content high-throughput  
750 microscopy in drug discovery. *Br. J. Pharmacol.* **152**, 62–71 (2007).
- 751 24. Lachance, J. & Cohen, D. J. Practical Fluorescence Reconstruction Microscopy for Large  
752 Samples and Low-Magnification Imaging. doi:10.1101/2020.03.05.979419
- 753 25. Falk, T. *et al.* U-Net: deep learning for cell counting, detection, and morphometry. *Nat.*  
754 *Methods* **16**, 67–70 (2019).
- 755 26. Belthangady, C. & Royer, L. A. Applications, promises, and pitfalls of deep learning for  
756 fluorescence image reconstruction. *Nat. Methods* **16**, 1215–1225 (2019).
- 757 27. Caicedo, J. C. *et al.* Data-analysis strategies for image-based cell profiling. *Nat. Methods*  
758 **14**, 849–863 (2017).
- 759 28. Van Valen, D. A. *et al.* Deep Learning Automates the Quantitative Analysis of Individual  
760 Cells in Live-Cell Imaging Experiments. *PLoS Comput. Biol.* **12**, 1–24 (2016).
- 761 29. Bahdanau, D., Cho, K. & Bengio, Y. *NEURAL MACHINE TRANSLATION BY JOINTLY*  
762 *LEARNING TO ALIGN AND TRANSLATE.*
- 763 30. Xu, K. *et al.* *Show, Attend and Tell: Neural Image Caption Generation with Visual*  
764 *Attention.*
- 765 31. Hoshen, Y. *VAIN: Attentional Multi-agent Predictive Modeling.*
- 766 32. Heinrich, M. A. *et al.* Size-dependent patterns of cell proliferation and migration in freely-  
767 expanding epithelia. *Elife* **9**, 1–21 (2020).

- 768 33. Marel, A. K. *et al.* Flow and diffusion in channel-guided cell migration. *Biophys. J.* **107**,  
769 1054–1064 (2014).
- 770 34. Metzner, C. *et al.* Superstatistical analysis and modelling of heterogeneous random  
771 walks. *Nat. Commun.* **6**, (2015).
- 772 35. Gorelik, R. & Gautreau, A. Quantitative and unbiased analysis of directional persistence  
773 in cell migration. *Nat. Protoc.* **9**, 1931–1943 (2014).
- 774 36. Mak, M., Reinhart-King, C. A. & Erickson, D. Microfabricated physical spatial gradients for  
775 investigating cell migration and invasion dynamics. *PLoS One* **6**, (2011).
- 776 37. Bazellieres, E. *et al.* Control of cell-cell forces and collective cell dynamics by the  
777 intercellular adhesome. *Nat. Cell Biol.* **17**, 409–420 (2015).
- 778 38. Poujade, M. *et al.* Collective migration of an epithelial monolayer. *Proc. Natl. Acad. Sci.*  
779 **104**, 15988–15993 (2007).
- 780 39. LaChance, J. & Cohen, D. J. Practical fluorescence reconstruction microscopy for large  
781 samples and low-magnification imaging. *PLoS Comput. Biol.* **16**, 1–24 (2020).
- 782 40. Hayer, A. *et al.* Engulfed cadherin fingers are polarized junctional structures between  
783 collectively migrating endothelial cells. *Nat. Cell Biol.* **18**, 1311–1323 (2016).
- 784 41. Jacinto, A., Martinez-Arias, A. & Martin, P. Mechanisms of epithelial fusion and repair.  
785 *Nat. Cell Biol.* **3**, 117–123 (2001).
- 786 42. O'Brien, L. E., Zegers, M. M. P. & Mostov, K. E. Building epithelial architecture: Insights  
787 from three-dimensional culture models. *Nat. Rev. Mol. Cell Biol.* **3**, 531–537 (2002).
- 788 43. Shellard, A. & Mayor, R. Supracellular migration - Beyond collective cell migration. *J. Cell*  
789 *Sci.* **132**, (2019).
- 790 44. Cohen, D. J., Glierich, M. & Nelson, W. J. Epithelial self-healing is recapitulated by a 3D  
791 biomimetic E-cadherin junction. *Proc. Natl. Acad. Sci. U. S. A.* **113**, 14698–14703 (2016).
- 792 45. Puliafito, A. *et al.* Collective and single cell behavior in epithelial contact inhibition. *Proc.*  
793 *Natl. Acad. Sci. U. S. A.* **109**, 739–744 (2012).
- 794 46. Bi, D., Lopez, J. H., Schwarz, J. M. & Manning, M. L. A density-independent rigidity  
795 transition in biological tissues. *Nat. Phys.* **11**, 1074–1079 (2015).
- 796 47. Schindelin, J. *et al.* Fiji: An open-source platform for biological-image analysis. *Nature*  
797 *Methods* **9**, 676–682 (2012).
- 798 48. BioVoxel Toolbox - ImageJ.
- 799 49. Lv, J.-Q. *et al.* Collective migrations in an epithelial–cancerous cell monolayer. *Acta*  
800 *Mech. Sin.* **1**, 3 (2021).
- 801 50. Zhang, J. *et al.* Energetic regulation of coordinated leader–follower dynamics during  
802 collective invasion of breast cancer cells. *Proc. Natl. Acad. Sci. U. S. A.* **116**, 7867–7872

803 (2019).

804 51. Ivers, L. P. *et al.* Dynamic and influential interaction of cancer cells with normal epithelial  
805 cells in 3D culture. *Cancer Cell Int.* **14**, 108 (2014).

806 52. Piotrowski-Daspit, A. S., Nerger, B. A., Wolf, A. E., Sundaresan, S. & Nelson, C. M.  
807 Dynamics of Tissue-Induced Alignment of Fibrous Extracellular Matrix. *Biophysj* **113**,  
808 702–713 (2017).

809 53. ImageJ | World Library - eBooks | Read eBooks online.

810 54. Tinevez, J. Y. *et al.* TrackMate: An open and extensible platform for single-particle  
811 tracking. *Methods* **115**, 80–90 (2017).

812 55. Weinman, J. J., Lidaka, A. & Aggarwal, S. TensorFlow: Large-scale machine learning.  
813 *GPU Comput. Gems Emerald Ed.* 277–291 (2011). doi:1603.04467

814 56. Chollet, F. *Keras*. (2015).

815 57. Information Theory, Inference and Learning Algorithms - David J. C. MacKay, David J. C.  
816 Mac Kay - Google Books.

817 58. LaChance, J., Suh, K. & Cohen, D. Deep attention networks for automated collective  
818 behavior discovery in epithelia. (2021). doi:10.5281/ZENODO.4959169

819

820

821

822

823

824

825

826

827

828

829

830

831

832



833 **Supporting Information**

834

835

836

837

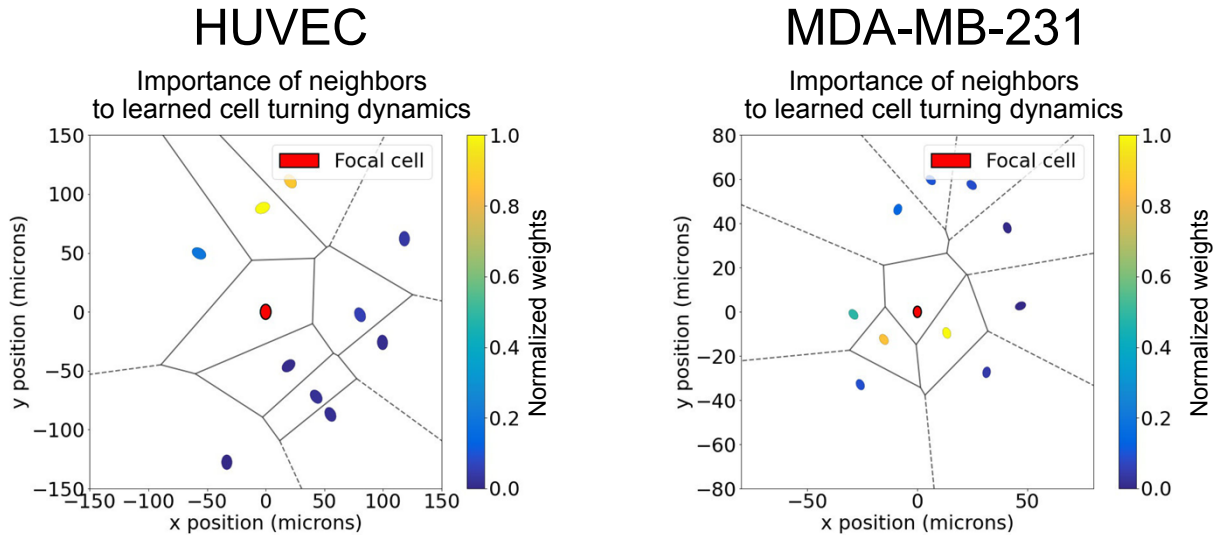

838

839 **S1 Figure Neighbor importance to learned turning dynamics, additional snapshots**

840 Individual agents are plotted in space ( $x$ ,  $y$ ) and colored according to relative attention weight  
841 ( $W$ ) as in Equation 1 for HUVECs (left) and MDA-MB-231 cells (right). Cell position is  
842 representing using nuclei centroids and black lines indicate Voronoi cells (see Methods).

843

844

845

846

847

848

849

850

851

852

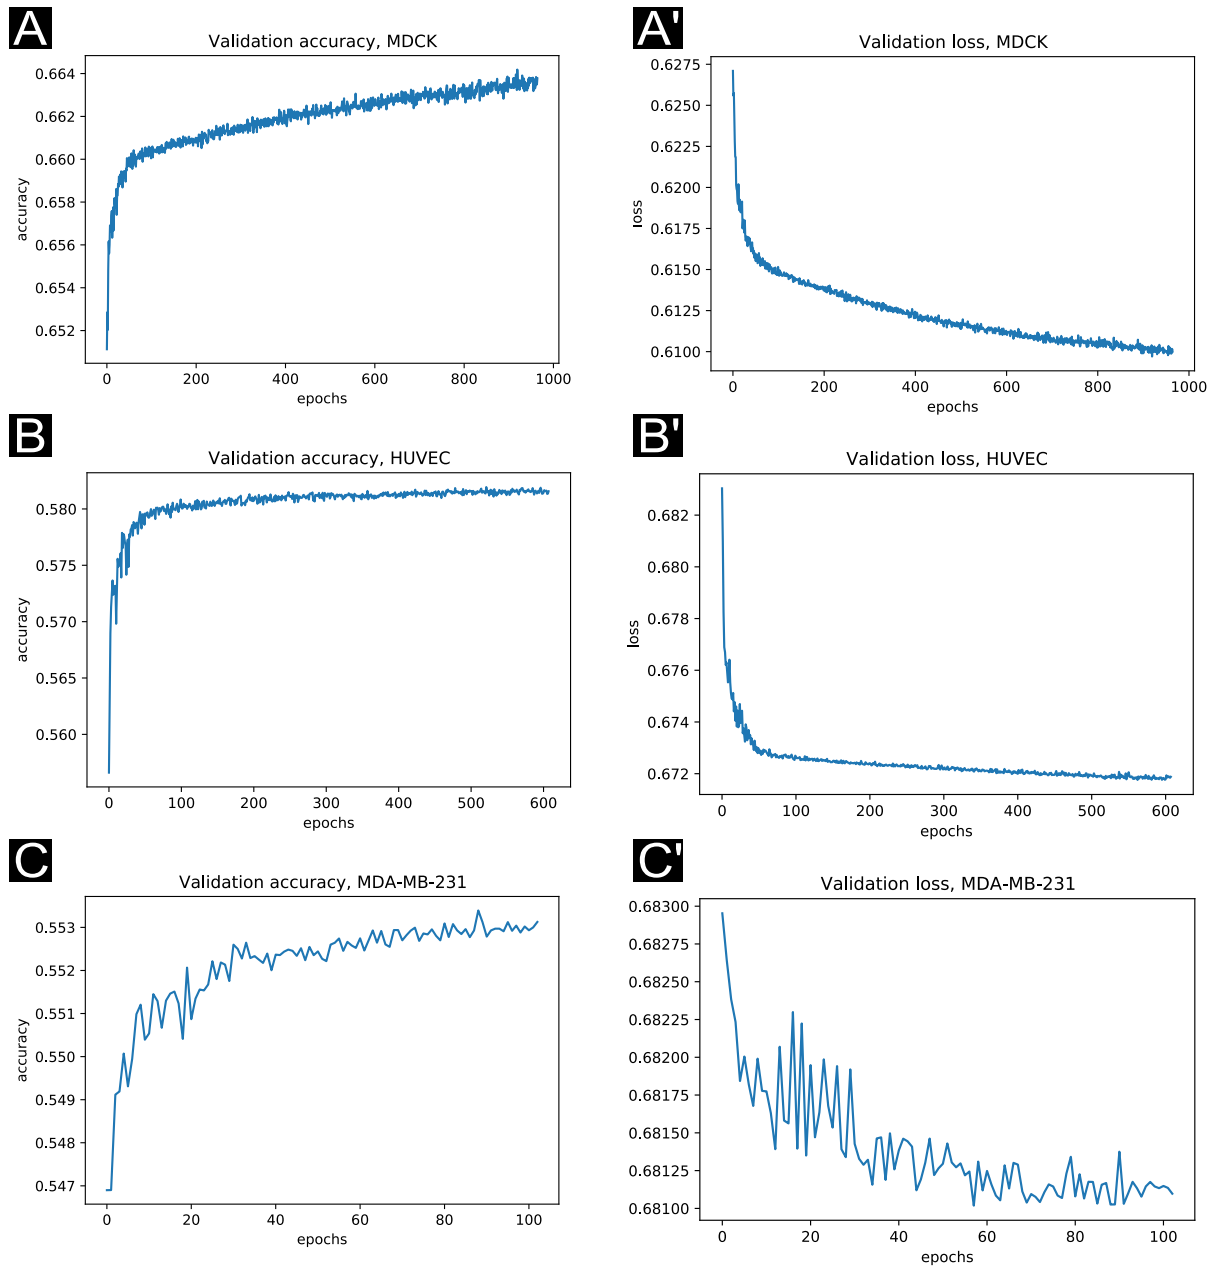

853  
854

855 **S2 Figure Representative loss functions from the attention network training process.**

856 Early stopping was enabled, so that if the validation loss did not decrease within a set number of  
857 epochs, the training process was terminated. Validation loss was noisier when training the  
858 network on MDA-MB-231 data, in which there is reduced cell-cell coordination.

859  
860  
861  
862  
863

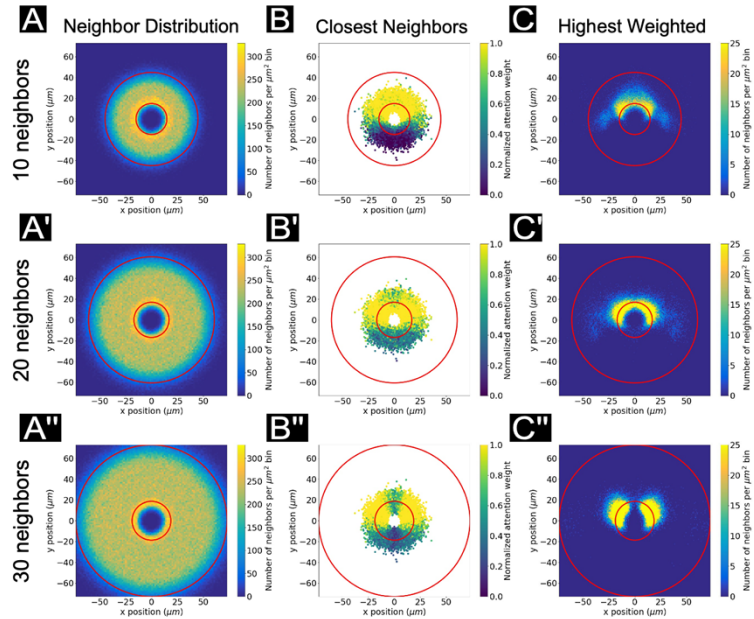

864

865 **S3 Figure MDCK (bulk) neighbor distribution, closest neighbor, and highest weight maps.**

866 Plots shown are analogous to the neighbor distribution, closest neighbor, and highest weight  
 867 neighbor maps are shown in Fig. 2D'-F', yet corresponding to the 10, 20, and 30 neighbor  
 868 networks with attention maps as in Fig. 3D-D''.

869

870

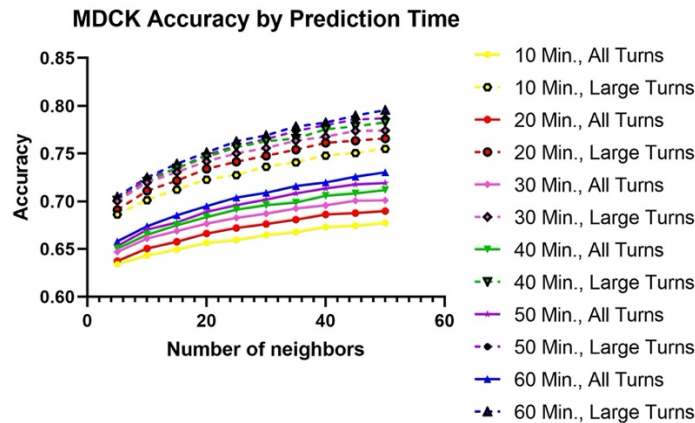

871

872 **S4 Figure Complete MDCK bulk region network accuracy plot.**

873 Network accuracy plots as prediction time and number of input neighbors is varied. Solid lines  
 874 reflect accuracy scores for all turning angles in the focal agent trajectory; dashed lines reflect  
 875 only large turns ( $\pm 20$ - $160^\circ$ ). Accuracy increases with both number of neighbors encompassed  
 876 by the network and prediction time. Cell trajectory timesteps were fixed at 10 minutes.

877

878

879

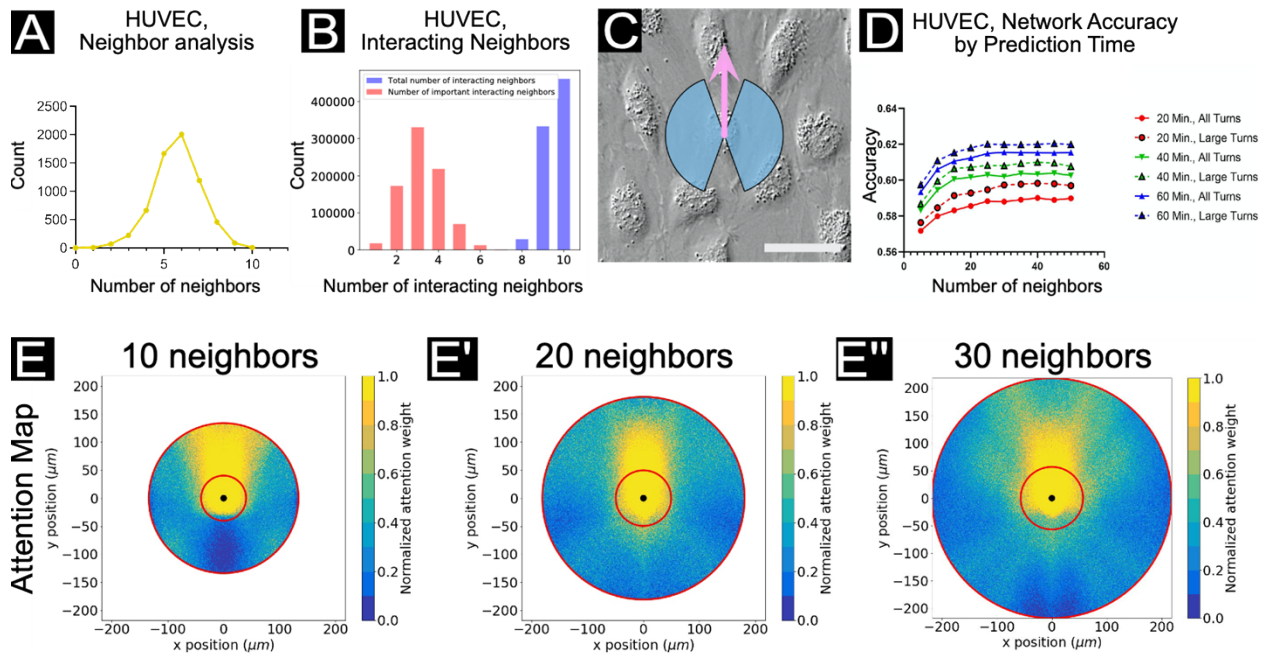

880

881

### 882 S5 Figure Local vs. long-range interactions in HUVECs.

883 (A) The number of nearest neighbors based on an analysis of 1115 cells using the ImageJ/FIJI<sup>47</sup>

884 BioVoxel plugin<sup>48</sup> (see Methods). A peak can be observed at 3 nearest neighbors.

885 (B) Histograms of total interacting cells (blue) and “important” interacting cells (red), as

886 determined by a function utilizing the network aggregation weights ( $W$ ) to estimate the most

887 influential neighbors.

888 (C) A snapshot of HUVEC cells with blue region indicating the extent of “large” turns ( $\pm 20$ - $160^\circ$ )

889 according to the focal cell trajectory (indicated by the pink arrow). Scale bar represents  $20 \mu\text{m}$

890 (D) Network accuracy plots as prediction time and number of input neighbors is varied. Solid

891 lines reflect accuracy scores for all turning angles in the focal agent trajectory; dashed lines

892 reflect only large turns ( $\pm 20$ - $160^\circ$ ). Accuracy increases with both number of neighbors

893 encompassed by the network and prediction time. Cell trajectory timesteps were fixed at 10

894 minutes.

895 (E, E', E'') Attention maps for networks encompassing 10 (left), 20 (middle), and 30 (right)

896 neighbors. Plots shown here are analogous to plots shown in Figure 3, with cell trajectory

897 timestep of 10 minutes. As the number of neighbors taken into consideration by the network

898 increases, a wider spatial range of interactions may be considered for forward motion prediction.

899

900

901

902

903

904

905

906



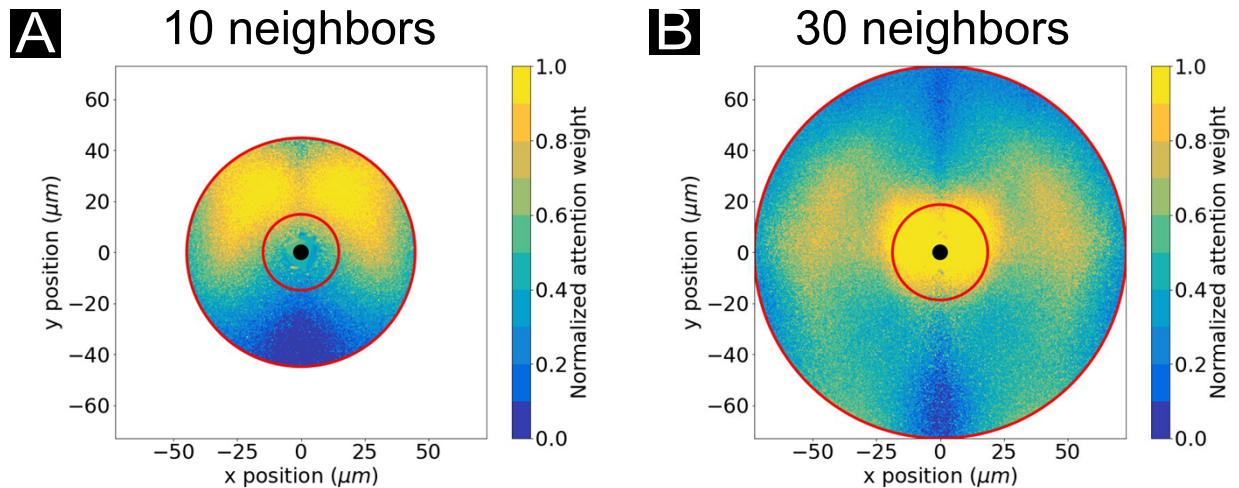

907  
908

909 **S6 Figure MDCK (bulk) attention maps, 60-minute prediction time interval.**

910 Representative attention weight contour plots are shown for MDCK cells with networks  
911 accounting for 10 neighbors in total (A) and 30 neighbors in total (30) with prediction time  
912 intervals of 60 minutes. For all conditions, normalized weight maps are shown and are  
913 analogous to the 20 minute prediction time interval attention maps shown in Fig. 3D and 3D”.

914  
915  
916

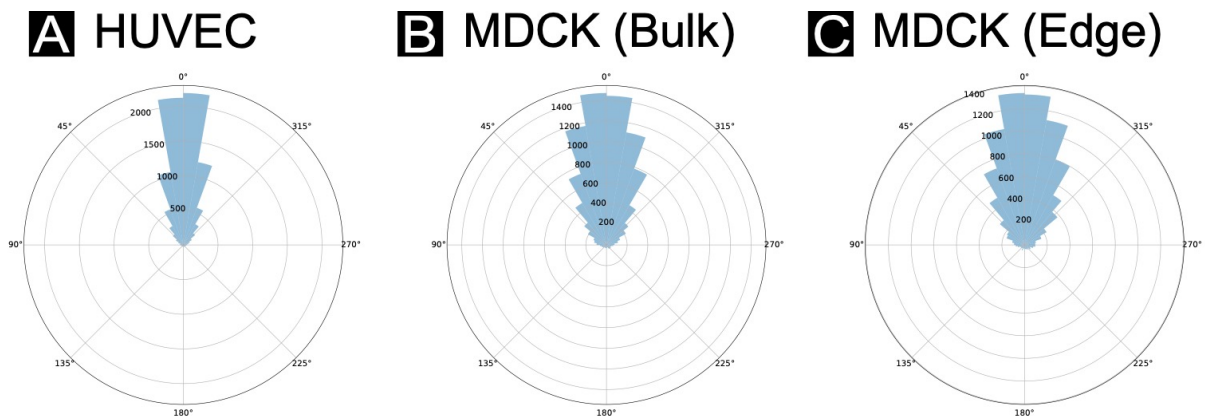

917  
918

919 **S7 Figure Focal cell turning angle distribution and persistence.**

920 A radial histogram of turning angles from focal cell trajectories, shown for (A) HUVECs, (B)  
921 MDCK cells in the bulk region, and (C) MDCK cells in the edge region (from the same tissues;  
922 see *Methods*). HUVEC angles tend to fall closer to vertical (0°). (D) persistence (“directedness”  
923 by orientation) over time. The persistence plot here highlights the tendency of the HUVECs in  
924 particular to proceed in a single direction.

925

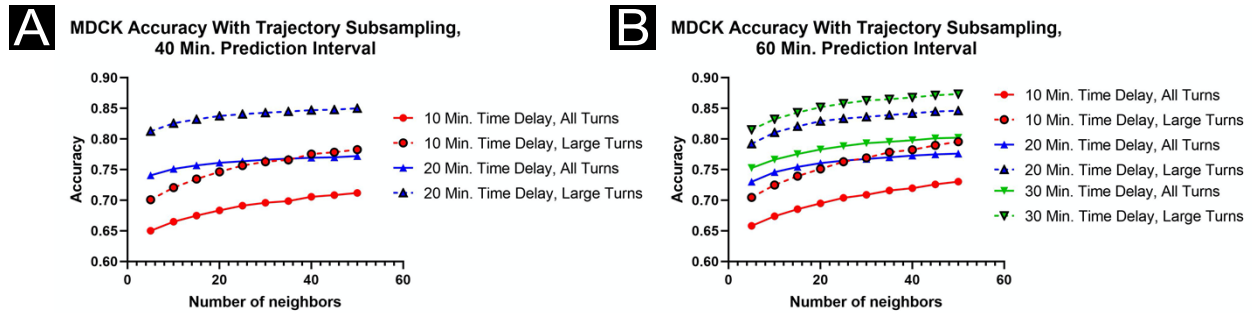

926

## 927 S8 Figure Network accuracy plots with trajectory subsampling: MDCK.

928 Network accuracy is shown as a function of number of neighbors encompassed by the network  
929 and time delay between cell trajectory points. (A) displays accuracy for a prediction time of 40  
930 minutes, with 10 (blue) and 20 (green) minute time delays, resulting from subsampling of the  
931 initial trajectory results. (B) displays accuracy for a prediction time of 60 minutes, with 10 (blue),  
932 20 (green), and 30 (red) minute time delays. Solid lines reflect accuracy scores for all turning  
933 angles in the focal agent trajectory; dashed lines reflect only large turns ( $\pm 20-160^\circ$ ). Accuracy  
934 increases as time delay is increased; in this experiment, the same number of historical steps is  
935 utilized, so subsampled trajectories include data spanning longer total time intervals.

936

937

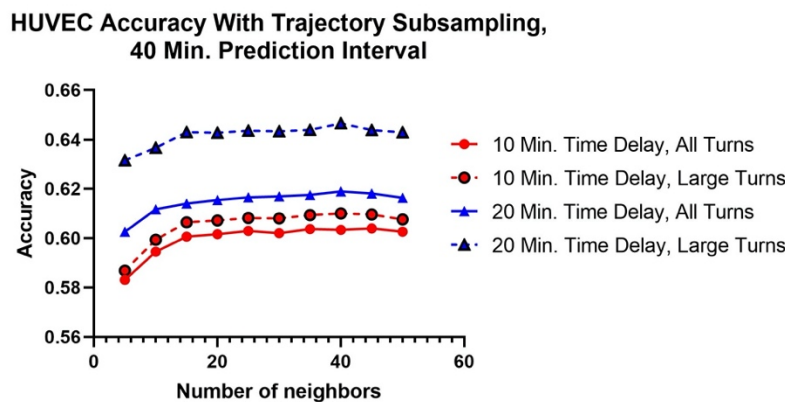

938

## 939 S9 Figure Network accuracy plots with trajectory subsampling: HUVEC.

940 Network accuracy is shown as a function of number of neighbors encompassed by the network  
941 and time delay between cell trajectory points. (A) displays accuracy for a prediction time of 40  
942 minutes, with 10 (blue) and 20 (green) minute time delays, resulting from subsampling of the  
943 initial trajectory results. Solid lines reflect accuracy scores for all turning angles in the focal  
944 agent trajectory; dashed lines reflect only large turns ( $\pm 20-160^\circ$ ). Accuracy increases as time  
945 delay is increased; in this experiment, the same number of historical steps is utilized, so  
946 subsampled trajectories include data spanning longer total time intervals.

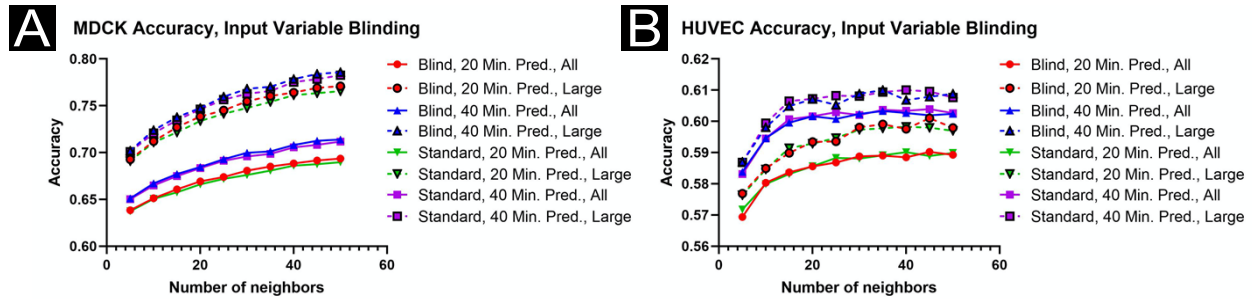

947

948 **S10 Figure Network accuracy plots with input acceleration blinding.**

949 Network accuracy is shown as a function of number of neighbors encompassed by the network,  
 950 prediction time, and input parameters to the network. Either the standard inputs are utilized  
 951 (lighter colors, see *Methods*), or the model was blind to focal tangential acceleration and  
 952 neighbor accelerations (darker colors; i.e., these parameters were excluded from model inputs).  
 953 (A) displays accuracy for MDCK cells, (B) for HUVECs. Solid lines reflect accuracy scores for all  
 954 turning angles in the focal agent trajectory; dashed lines reflect only large turns ( $\pm 20$ - $160^\circ$ ).  
 955 Accuracy is not substantially changed as a function of acceleration blinding.

956

957

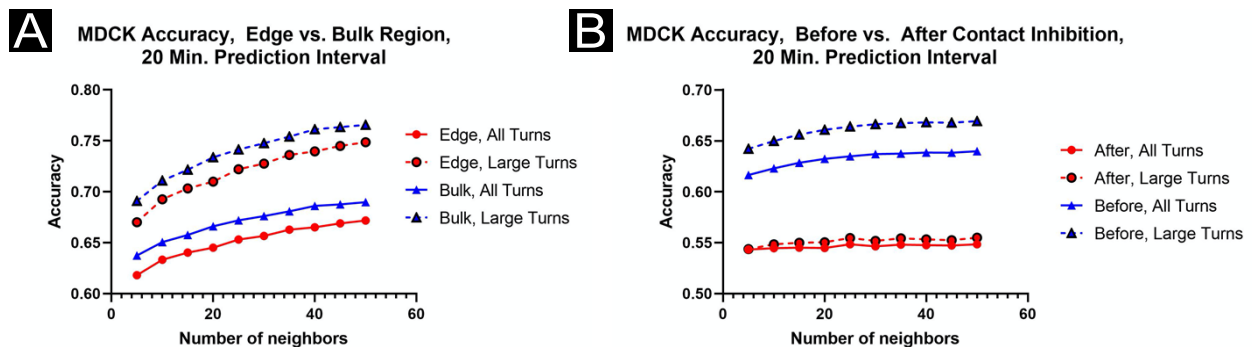

958

959 **S11 Figure Accuracy results for MDCK cells, biophysical modifications**

960 (A) Network accuracy plots as prediction time and number of input neighbors is varied for both  
 961 bulk (darker colors) and edge (lighter colors) regions within a confluent MDCK tissue. Solid lines  
 962 reflect accuracy scores for all turning angles in the focal agent trajectory; dashed lines reflect  
 963 only large turns ( $\pm 20$ - $160^\circ$ ). Accuracy results tended to be slightly higher in the bulk region.

964 (B) Network accuracy plots as prediction time and number of input neighbors is varied for the  
 965 same MDCK tissues prior to (lighter colors) and after (darker colors) contact inhibition. Accuracy  
 966 results were higher prior to contact inhibition.

967

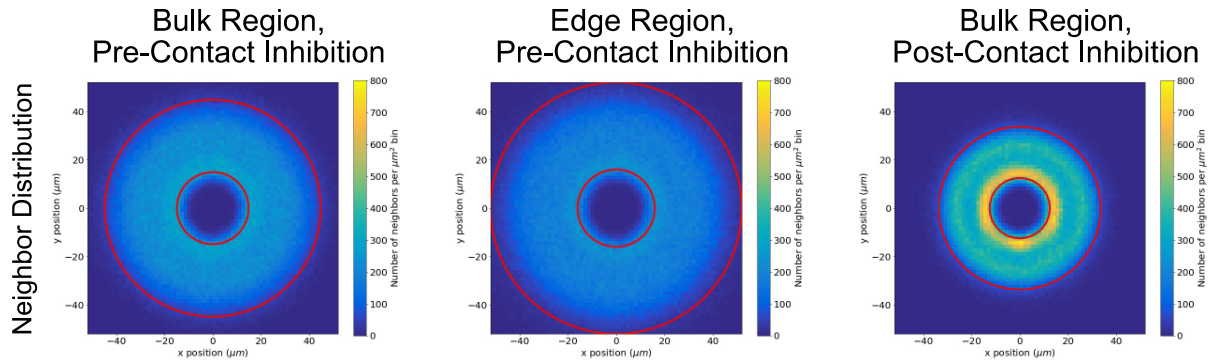

968  
969  
970  
971  
972  
973  
974

**S12 Figure Neighbor distribution plots for MDCK biophysical variations.**

Histograms showing the distribution of data points (neighbor cell locations) from which the attention maps in Figs. 5B,B',B'' were generated.

**S1, S2, S3 Movies HUVEC, MDCK, and MDA-MB-231 representative data.**

S1 Movie shows a phase-contrast timelapse of HUVEC cells, imaged at 4x magnification, with fluorescent stained nuclei overlaid. S2 Movie shows a phase-contrast timelapse of MDCK cells, imaged at 10x magnification, with fluorescent stained nuclei overlaid. S3 Movie shows a differential interference contrast (DIC) timelapse of MDA-MB-231 cells, imaged at 10x magnification, with fluorescent stained nuclei overlaid.

981

**S4 Movie MDCK post-contact-inhibition representative data.**

S4 Movie shows MDCK tissue after contact inhibition, imaged at 4x magnification, with overlaid nuclei predictions produced using a neural network (see *Methods*). This movie is from the dataset as S2 Movie, but it shows the complete progression from an early confluent tissue to a late stage, mature tissue with full contact inhibition and jammed cells.

987  
988



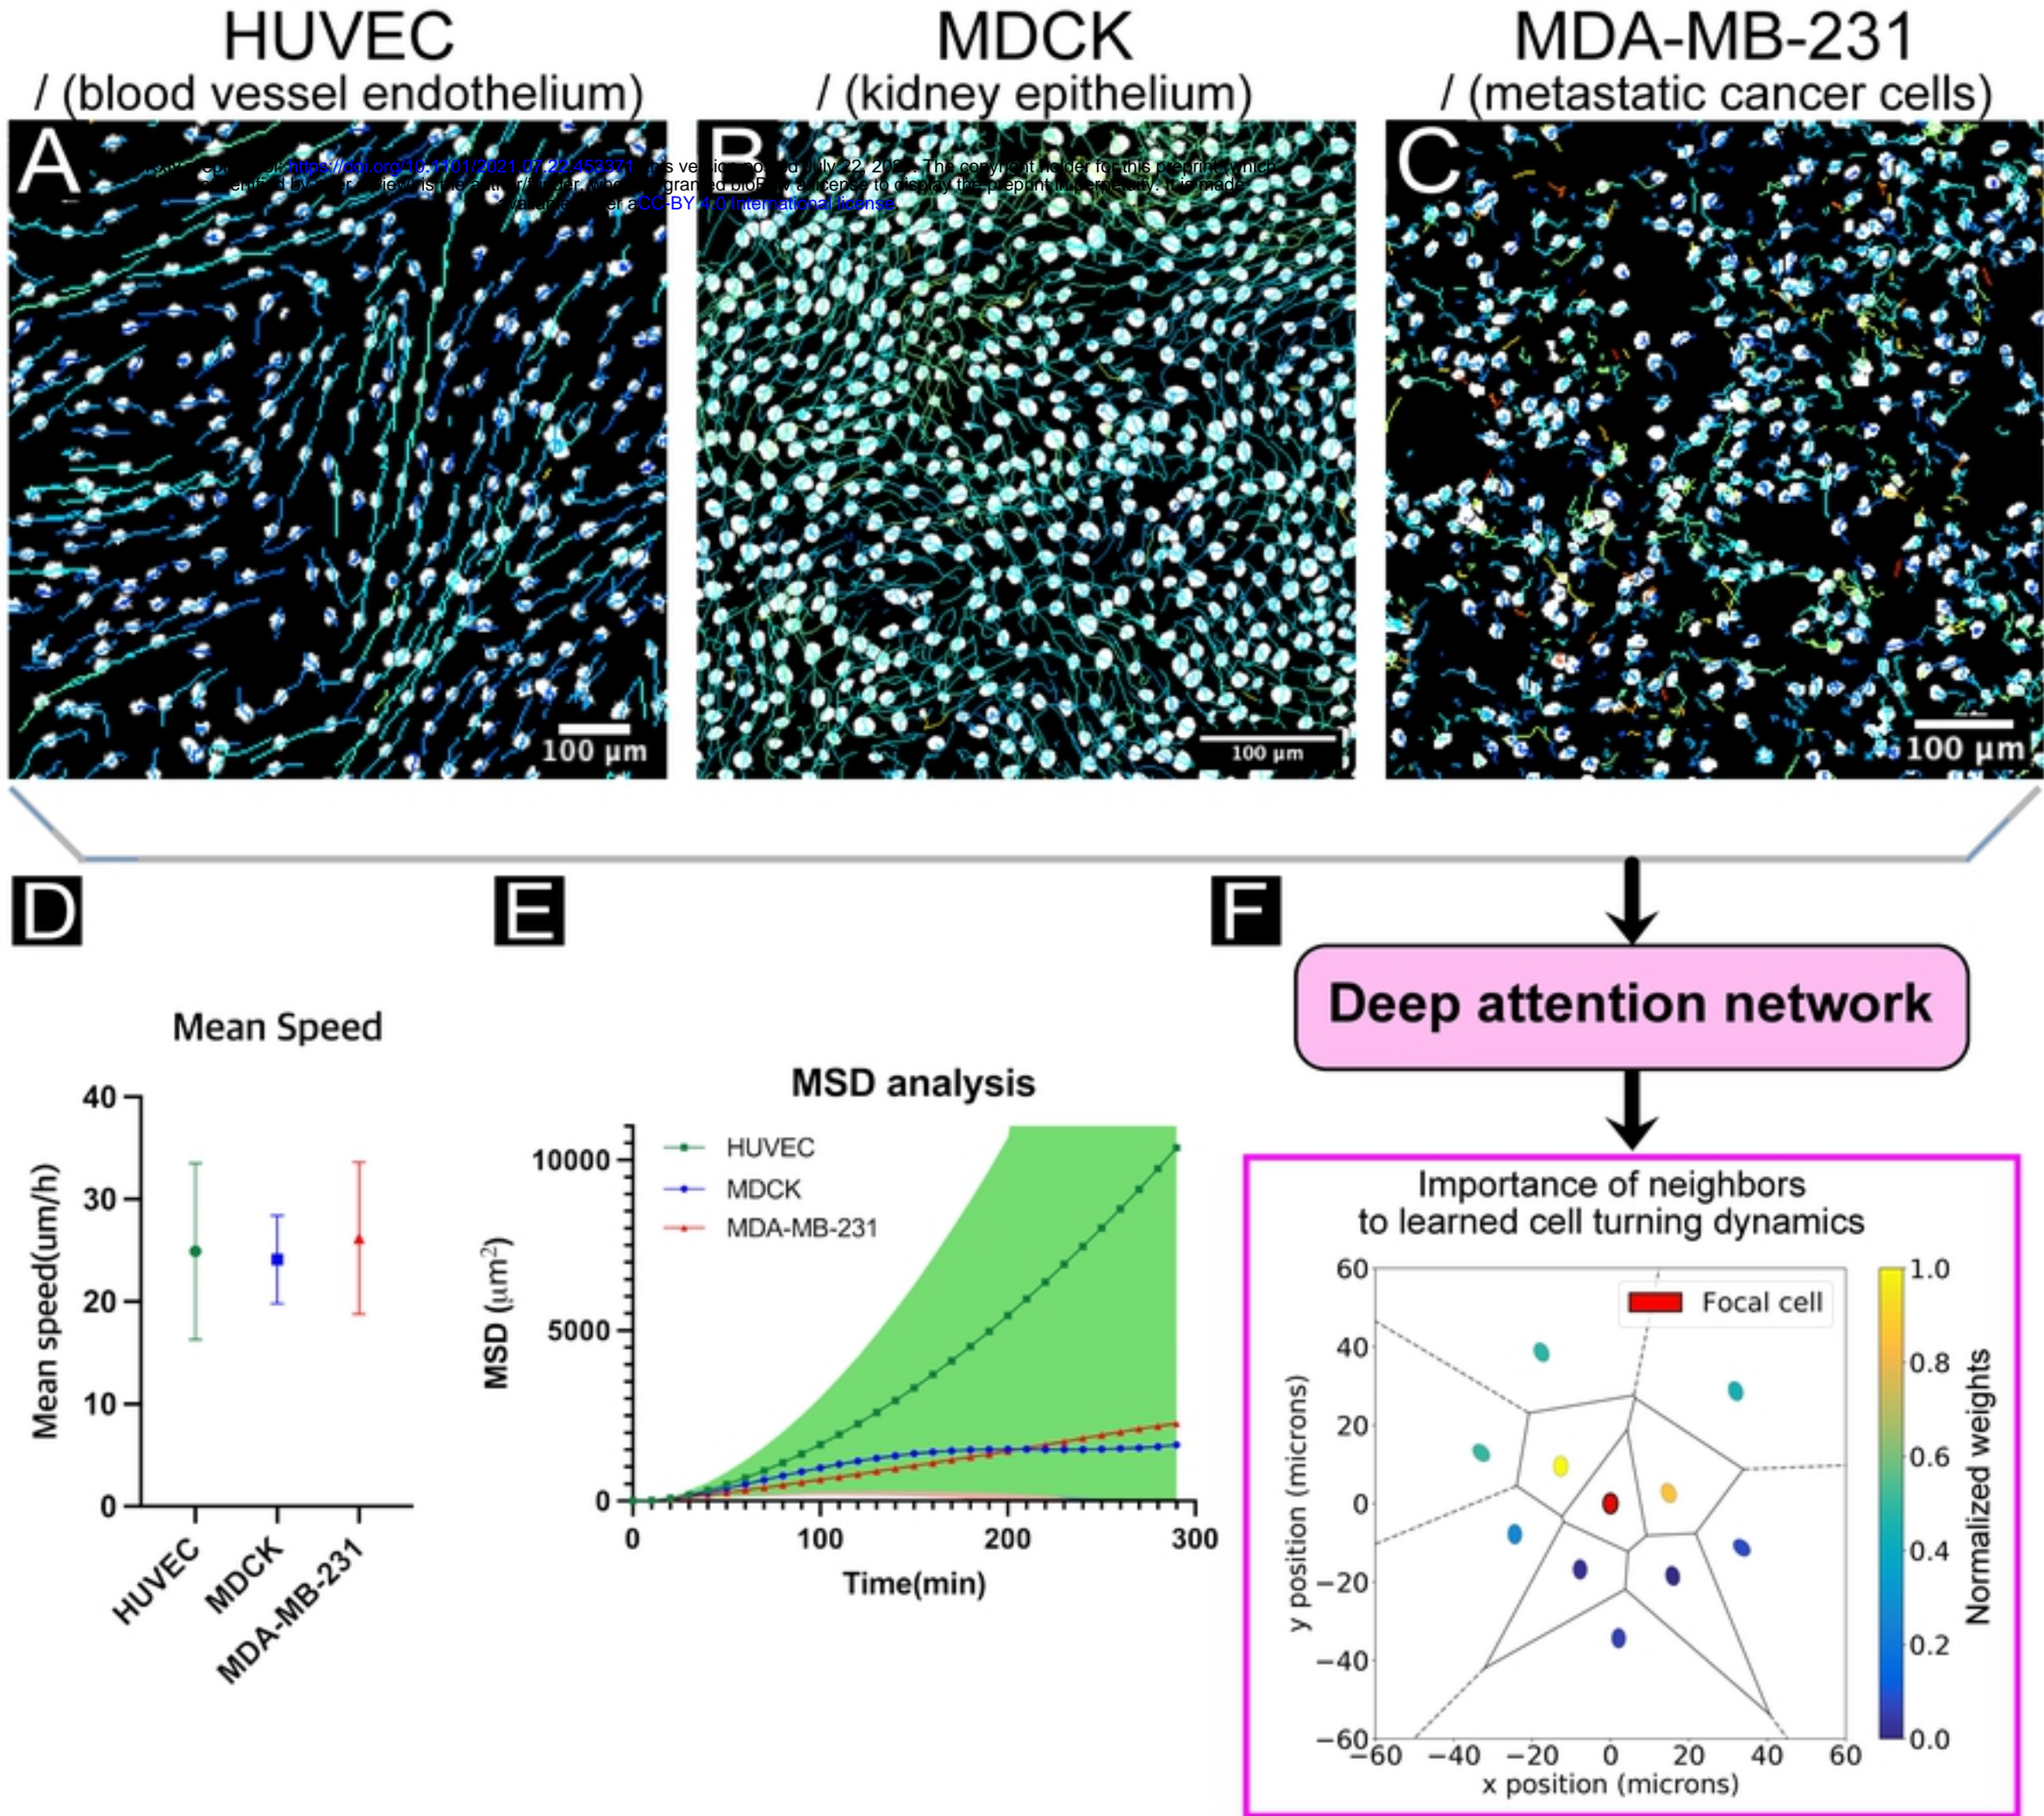

Figure 1



# HUVEC (VE-Cadherin)

# MDCK (E-Cadherin)

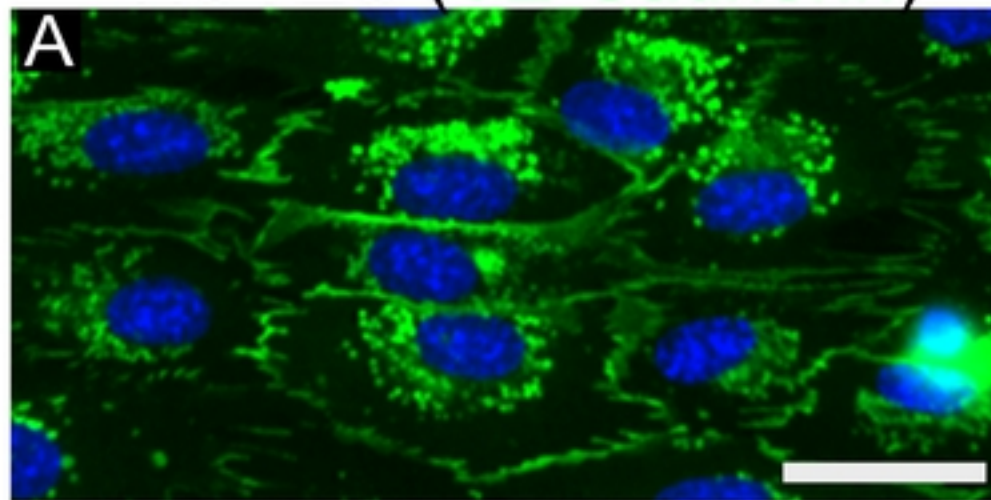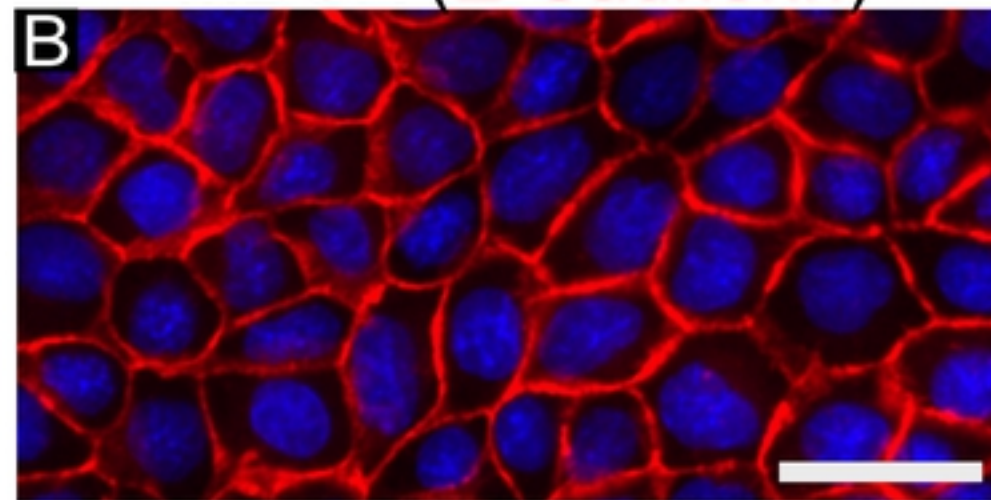

**C** Attention Map

**D** Neighbor Distribution

**E** Closest Neighbors

**F** Highest Weighted

HUVEC

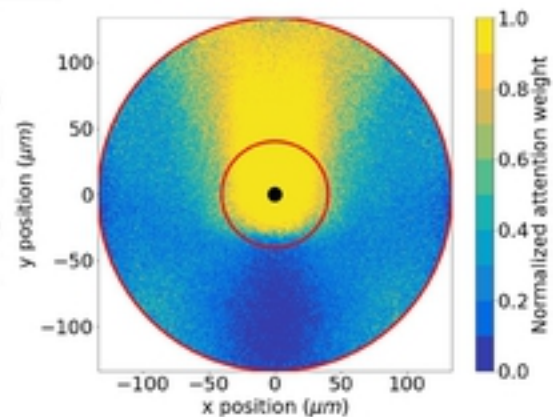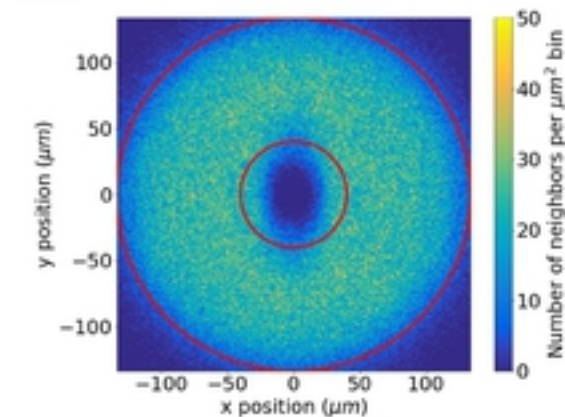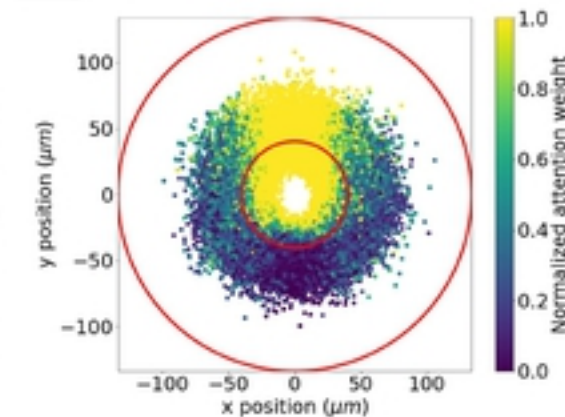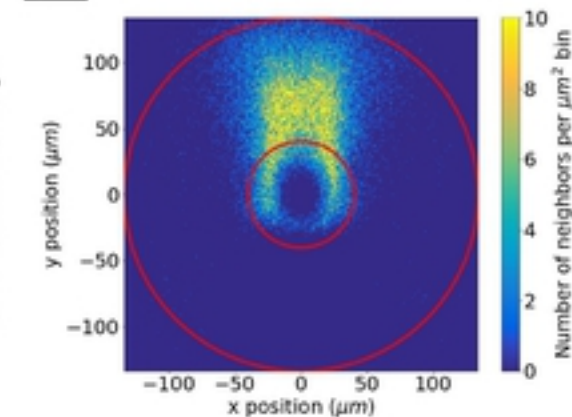

MDCK

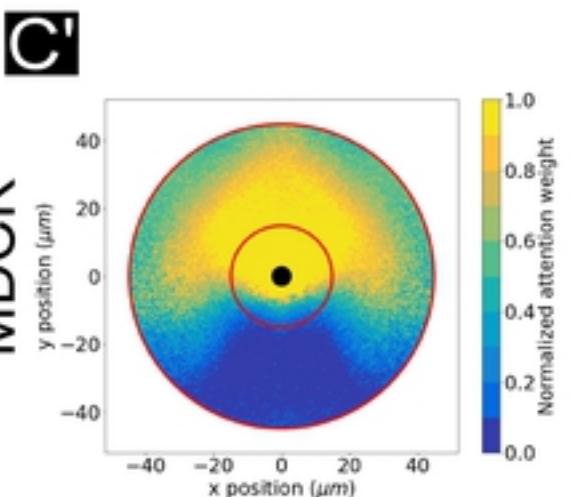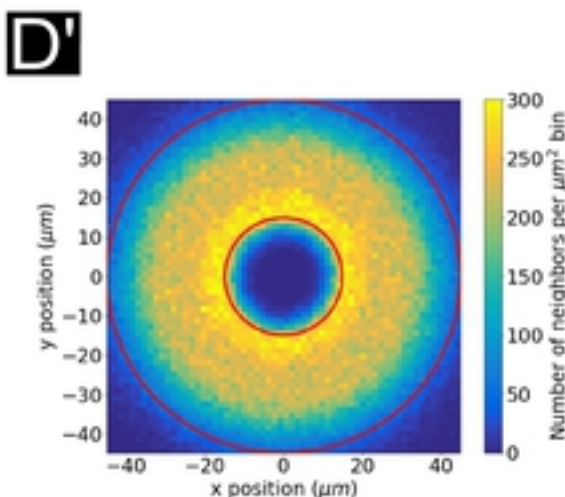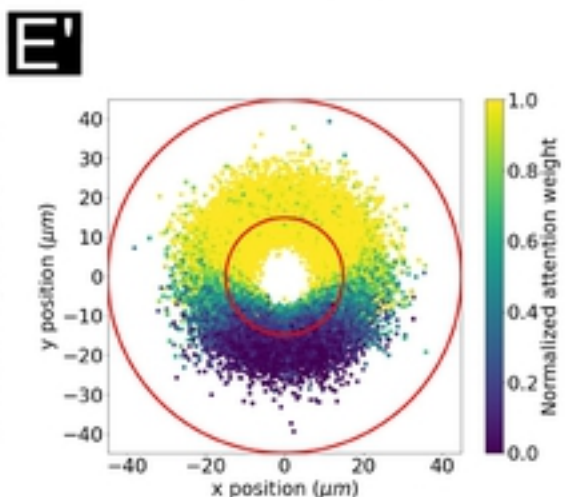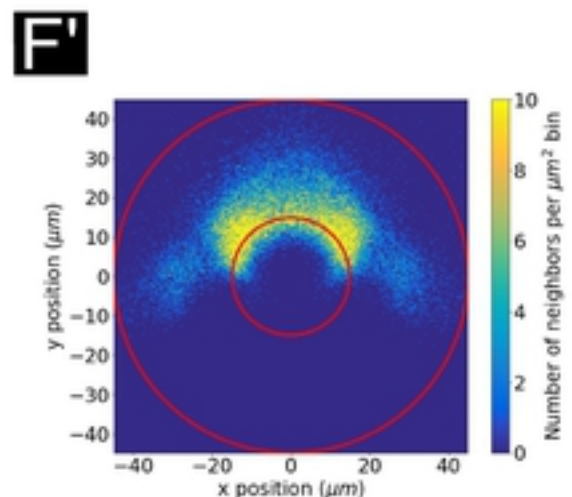

Figure 2

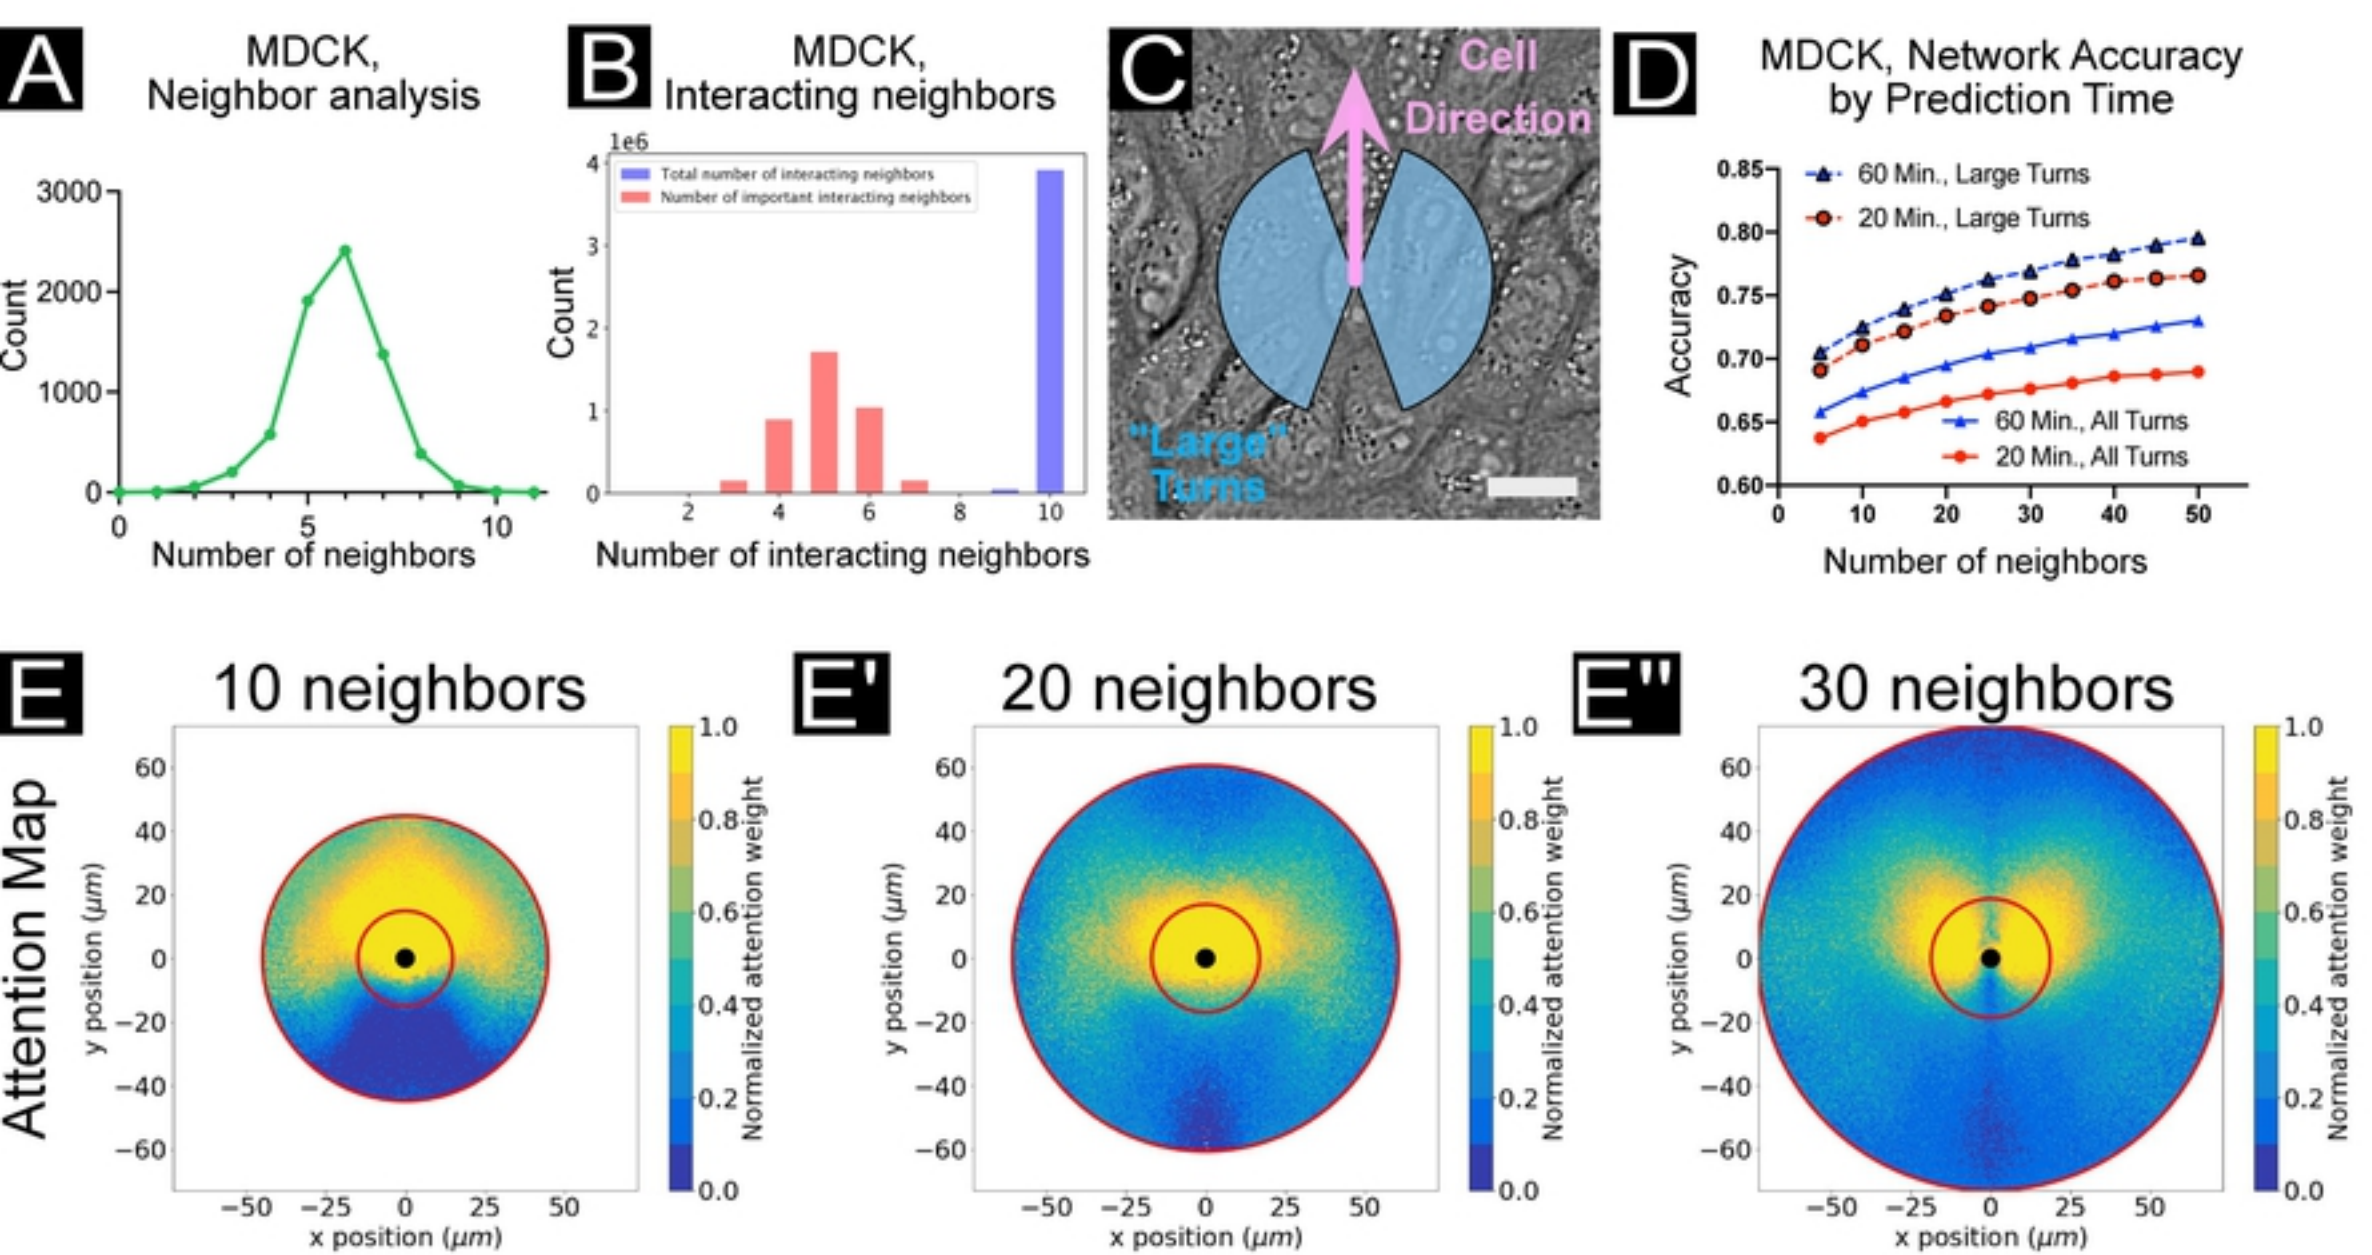

Figure 3



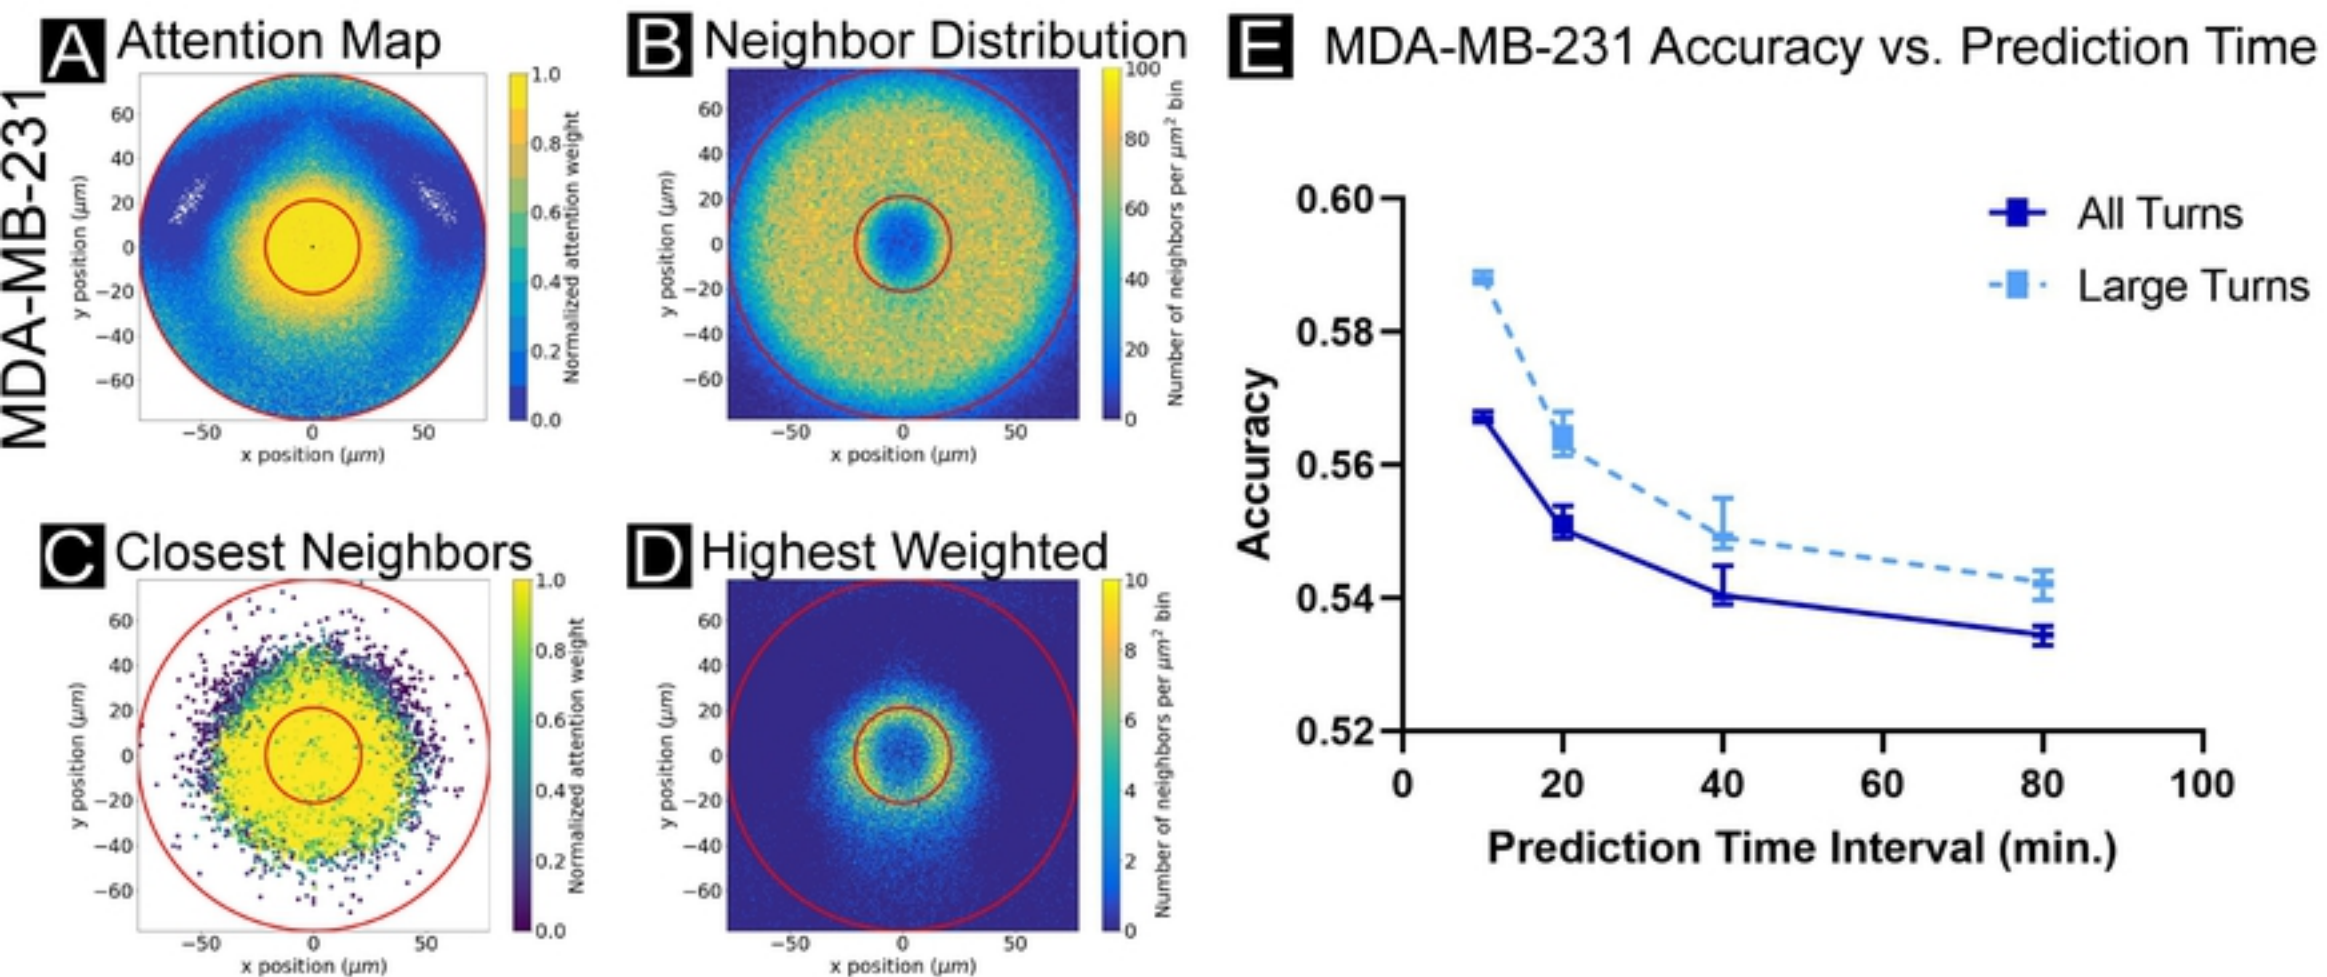

Figure 4



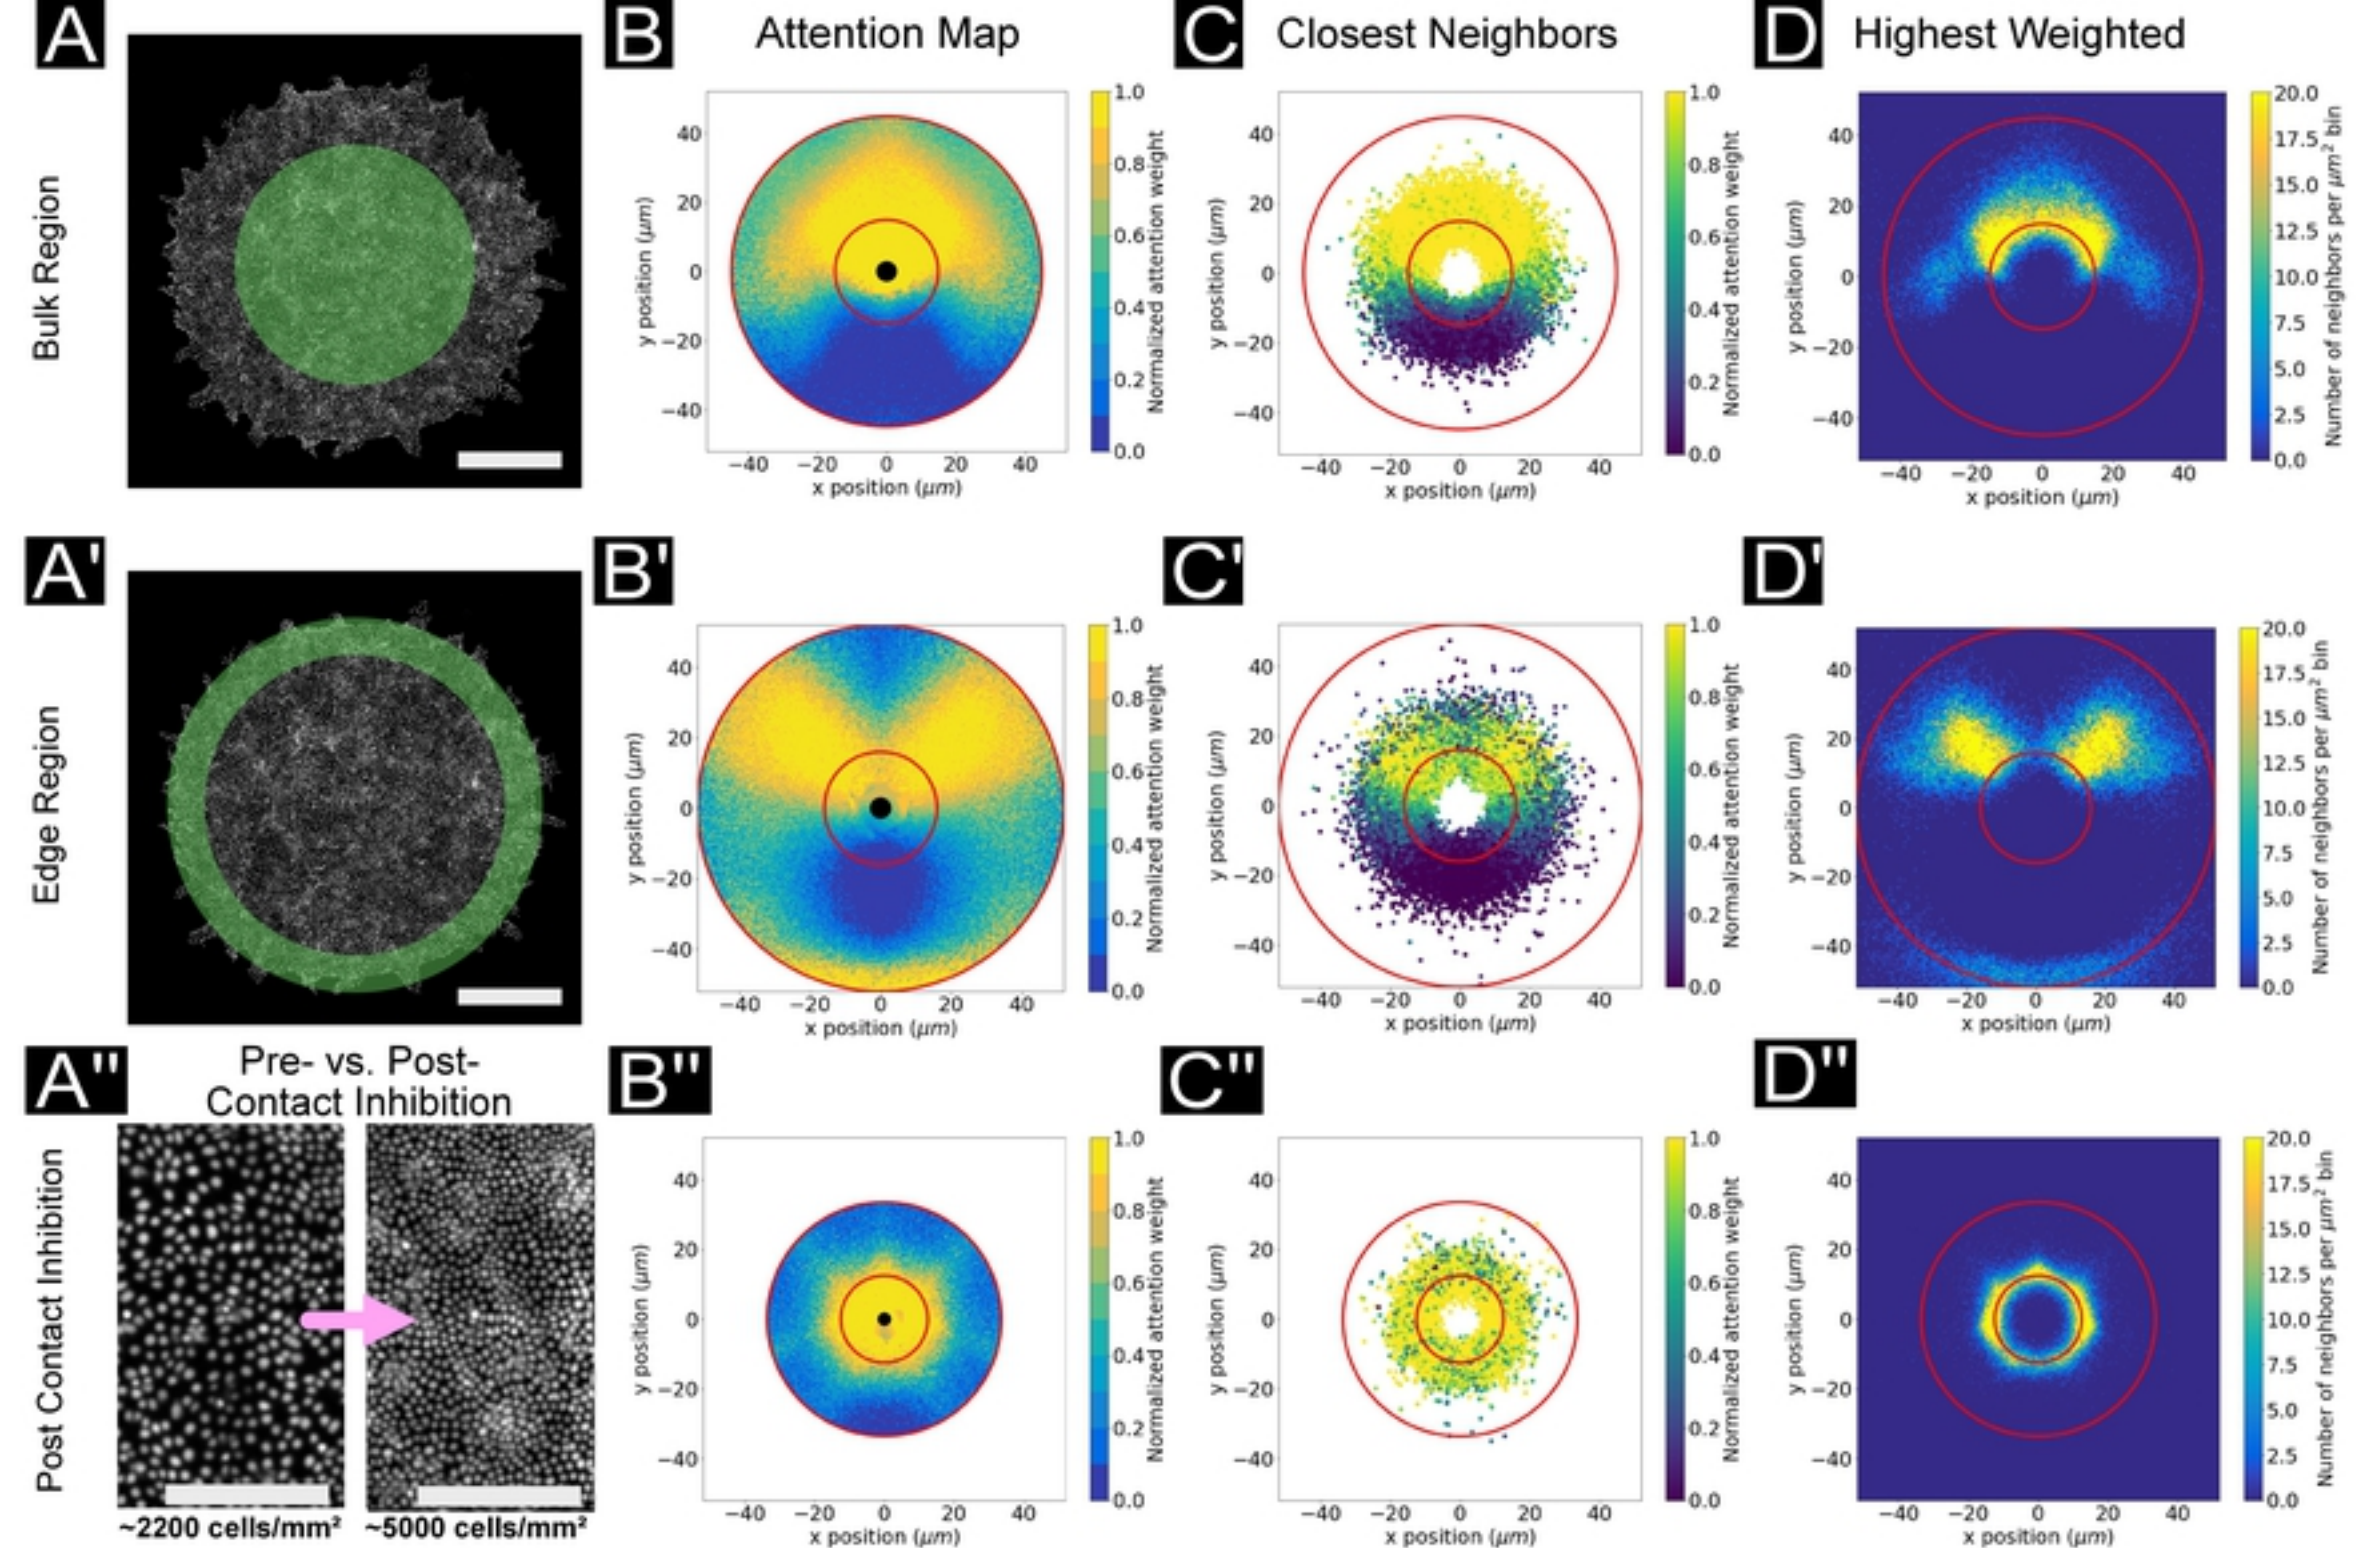

Figure 5
